# mDrop-seq: Massively parallel single-cell RNA-seq of *Saccharomyces cerevisiae* and *Candida albicans*

Ryan Dohn<sup>1,2</sup>, Bingqing Xie<sup>1</sup>, Rebecca Back<sup>1</sup>, Alan Selewa<sup>1,3</sup>, Heather Eckart<sup>1</sup>, Reeta Prusty Rao<sup>4</sup>, A. Basu<sup>1,2,3,\*</sup>

<sup>1</sup> Section of Genetic Medicine, Department of Medicine, University of Chicago

<sup>2</sup> Committee on Genetics, Genomics and Systems Biology, University of Chicago

<sup>3</sup> Biophysical Sciences Graduate Program, University of Chicago

<sup>4</sup> Department of Biology and Biotechnology, Worcester Polytechnic Institute

\* Correspondence: Anindita Basu ([onibasus@uchicago.edu](mailto:onibasus@uchicago.edu))

## Abstract

Advances in high-throughput single-cell mRNA sequencing (scRNA-seq) have been limited till date by technical challenges like tough cell walls and low RNA quantity that prevented transcriptomic profiling of microbial species at throughput. We present microbial Drop-seq or mDrop-seq, a high-throughput scRNA-seq technique that is used on two yeast species, *Saccharomyces cerevisiae*, a popular model organism and *Candida albicans*, a common opportunistic pathogen. We benchmarked mDrop-seq for sensitivity and specificity and used it to profile 35,109 *S. cerevisiae* cells to detect variation in mRNA levels between them. As a proof of concept, we quantified expression differences in heat-shocked *S. cerevisiae* using mDrop-seq. We detected differential activation of stress response genes within a seemingly homogenous population of *S. cerevisiae* under heat-shock. We also applied mDrop-seq to *C. albicans* cells, a polymorphic and clinically relevant yeast species with thicker cell wall compared to *S. cerevisiae*. Single cell transcriptomes in 39,705 *C. albicans* cells was characterized using mDrop-seq under different conditions, including exposure to fluconazole, a common anti-fungal drug. We noted differential regulation in stress response and drug target pathways between *C. albicans* cells, changes in cell cycle patterns and marked increases in histone activity. These experiments are among the first high throughput single cell RNA-seq on different yeast species and demonstrate mDrop-seq as an affordable, easily implementable, and scalable technique that can quantify the variability in gene expression in different yeast species. We hope that mDrop-seq will lead to better understanding of genetic variation in yeasts in response to stimuli and find immediate applications in investigating drug resistance and infection outcome.

## 39 Introduction

40 The rise of high-throughput single-cell mRNA sequencing (scRNA-seq) has led to greater  
41 understanding of the functional and phenotypic heterogeneity present in our body on a  
42 cellular level. Primarily developed for mammalian cells [1], scRNA-seq uses the  
43 transcriptome of a single cell to analyze of cell type [1], cell state [2], and cell response.[3]  
44 While variation between different cell types (in a multicellular organism) or cells of  
45 different species may be expected, scRNA-seq techniques have shown that there is  
46 significant cell-to-cell heterogeneity even between otherwise identical cells.[4] High-  
47 throughput techniques can examine thousands of cells at once, adding statistical power  
48 to determine variability between cells.[1], [5]

49 Technological challenges, such as the tough cell walls, small size, and concomitantly  
50 smaller amounts of transcripts per cell [6] however, have prevented similar applications  
51 in unicellular microbial organisms.[7] The strength and rigidity of the microbial cell walls  
52 composed of diverse components, e.g., peptidoglycans in bacteria, and chitin and  $\beta$ -  
53 glucan layers in yeasts [8]–[10] make them resistant to most lysis agents used for scRNA-  
54 seq. Microbes also have significantly less mRNA compared to animal cells, with estimates  
55 ranging up to two orders of magnitude less for bacterial cells.[11], [12]

56 Despite the challenges, achieving high-throughput microbial scRNA-seq is essential to  
57 understanding the heterogeneity and complex interactions between cells in a population.  
58 A few recent studies profiled *S. cerevisiae* at single cell resolution [13], [14], [15].  
59 However, clinically relevant yeast species, such as *Candida albicans*, have yet to be  
60 characterized with single-cell resolution in a high-throughput manner. Single-cell RNA-  
61 seq on fungal pathogens such as *Candida albicans* and *Candida auris* can help

62 understand the commensal-to-pathogenic switch that lead to opportunistic infections.[16],  
63 [17] As a common hospital acquired infection, *C. albicans* can cause both superficial  
64 infections in humans and severe systemic infections in immunocompromised  
65 individuals.[18] Understanding the heterogeneity in how individual yeast cells respond to  
66 changes in the hosts' immune system or their shifting microbiome can help treat and  
67 prevent such infections. The emergence of drug resistant microbes is an urgent human  
68 health crisis.[19] Molecular mechanisms that confer protection to a select few cells when  
69 the parent population is decimated by anti-microbial agents can help understand the rise  
70 of drug-resistant strains.[20]  
71 Here, we present microbial Drop-seq, or mDrop-seq as a method of high-throughput  
72 scRNA-seq of different yeast species. With modifications to the Drop-seq platform [1], we  
73 were able to accomplish microfluidic compartmentalization of single cells, in-droplet lysis  
74 and cellular barcoding of two species of yeast, viz., *S. cerevisiae* and *C. albicans* for  
75 scRNA-seq at scale. We quantified the transcriptional heterogeneity within clonal  
76 populations of yeast cells and profiled their response at single-cell resolution to  
77 environmental stress, such as heat shock, and exposure to fluconazole, a common anti-  
78 fungal agent. Under heat shock at 42 °C, we observe differential expression of key stress  
79 response genes, including *HSP12*, *HSP26*, and *HSP42* in *S. cerevisiae* cells. When  
80 exposed to fluconazole, *C. albicans* cells show differential upregulation of key drug target  
81 pathways such as ergosterol biosynthesis and ribosome activity, and an overall increase  
82 in histone activity. Importantly, both *S. cerevisiae* and *C. albicans* show disruption in their  
83 cell cycle patterns under heat shock and fluconazole exposure, respectively. Taken  
84 together, we posit that the cell cycle state of the yeast cell in a population of continuously

85 cycling cells is related to the variability in the cell's response to stress. mDrop-seq's ability  
86 to simultaneously profile a mix two phenotypically different species demonstrate that  
87 different fungal species are amenable to single-cell transcriptomic profiling using mDrop-  
88 seq. scRNA-seq of a mix of *S. cerevisiae* and *C. albicans* also demonstrates that mDrop-  
89 seq is capable of simultaneous single-cell profiling of a population of different yeast  
90 species.

91

## 92 **Results**

### 93 **Optimizing single yeast cell lysis in droplets**

94 To establish a high-throughput scRNA-seq method for yeast cells such as *S. cerevisiae*  
95 and *C. albicans*, we adapted the emulsion droplet and bead-based DNA barcoding  
96 scheme previously used in Drop-seq [1] and DroNc-seq.[21] Initial experiments were  
97 performed using *S. cerevisiae*, a popular model organism that is amenable to technology  
98 development due to the species' relatively thinner cell wall (~120 nm, compared to ~150  
99 nm thick cell walls in *C. albicans* [22]), and easier lysis. *S. cerevisiae* also has a well-  
100 annotated genome that is useful to establish data analysis tools. Laboratory strains  
101 BY4741 and SC5314 were used for *S. cerevisiae* and *C. albicans*, respectively.

102 The scRNA-seq workflow in yeasts in microfluidic drops is summarized in Figure 1A. To  
103 determine the duration of droplet incubation for optimal zymolyase activity needed for  
104 each species, a single collection of mDrop-seq droplets on *S. cerevisiae* was split into  
105 three different pools and each pool was incubated in a 37 °C water bath for 10, 15, and  
106 20 minutes, guided by bulk lysis experiments. The droplets were inspected by optical  
107 microscopy following incubation, to ensure droplet stability and cell lysis.

108 The 10-min lysis incubation yielded lower quantity of cDNA, indicating incomplete lysis  
109 and were excluded from further analysis. The 15 and 20 min incubations generated two  
110 libraries, indicated as SC\_15min\_Rep1 and SC\_20min\_Rep1. There were ~5000-10,000  
111 cells processed per sample. Figure 1C shows the number of features (left), as a proxy for  
112 genes, and Unique Molecular Identifiers or UMI (right), as a proxy for number of mRNA  
113 molecules captured per cell barcode. The UMI identifies individual mRNA molecules  
114 detected, allowing correction for PCR replicates to prevent PCR bias. Supplementary  
115 Table S1 summarizes the total and average number of reads from each sample, number  
116 of cells, mean number of genes and UMI obtained from a single cell, and the total number  
117 of unique genes obtained per experiment. We filtered out cell barcodes with less than 200  
118 or more than 2000 genes detected, as they likely represent poor quality cells or multiple  
119 cells loaded in a single droplet, respectively. Across all experiments, we saw only 30-  
120 35% more UMI compared to the number of genes detected [23]. This experiment was  
121 performed twice.

122 The two mDrop-seq datasets from the lysis trial, SC\_15min\_Rep1, SC\_20min\_Rep1  
123 overlap in principal component (PC) space (Figures S1A, B, C), with a Pearson  
124 correlation > 0.99 between the datasets for UMI counts. This allowed us to combine the  
125 SC\_15min\_Rep1, SC\_20min\_Rep1 datasets into a single dataset of 12,012 cells which  
126 we used to systematically explore differential expression (DE) in *S. cerevisiae* genes.  
127 Figure 1D shows the combined dataset in Uniform Manifold Approximation and Projection  
128 (UMAP) space.[24] The genes with highest expression in this dataset were involved in  
129 glycolysis (*TDH3*, *ENO2*, *FBA1*), stress response (*HSC82*), or ribosome biogenesis  
130 (*RPP2B*) (Figure 1E). As these cells were grown in 2% glucose medium and lysed in log

131 phase, the presence of glycolysis genes is expected. We also saw expression of general  
132 stress response genes common to heat shock, DNA replication stress and oxidative  
133 stress that we attribute to the yeast cells responding to stresses (e.g., enzymatic lysis,  
134 heat) during cell lysis.

135 To compare mDrop-seq with bulk RNA-seq, we also performed population-level RNA-seq  
136 on *S. cerevisiae*. A pseudo-bulk [1] comparison of log normalized transcript counts in  
137 mDrop-seq showed a Pearson's correlation of 0.85 with our bulk RNA-seq data, and  
138 overall good correlation (~0.8, on average), with public RNA-seq datasets.[25] The  
139 correlation in transcript counts between our bulk RNA-seq and public datasets was 0.85,  
140 comparable to mDrop-seq.

141

#### 142 **Single cell specificity of mDrop-seq confirmed by species mixing experiments**

143 To establish that we have single-cell specificity in our experiments, species-mixing  
144 experiments [1] were performed using a mix of *S. cerevisiae* and *C. albicans* cells.  
145 Species-mixing experiments allow checking for 'doublets', or cell barcodes that capture  
146 two cells, assuming that a fraction of such drops will capture both *S. cerevisiae* and *C.*  
147 *albicans* cells and the corresponding barcode beads will yield cell barcodes that align to  
148 both *S. cerevisiae* and *C. albicans* genomes. The probability of finding one or more cells  
149 in a single drop may be estimated assuming a uniform concentration of cells in the loading  
150 medium following a Poisson distribution. The Poisson parameter,  $\lambda$  governs the cell  
151 distribution in drops and may be used to calculate the fraction of cell doublets, etc. in the  
152 experiment. Two different cell-loading conditions were tested at 350,000 and 700,000  
153 cells/mL, representing Poisson loading parameter,  $\lambda = 0.077$  and 0.15, respectively.

154 Across 4,120 cells detected at  $\lambda = 0.077$  or 7.7% Poisson loading, majority of the  
155 barcodes map to one genome only, with only 47 barcodes mapping to both *S. cerevisiae*  
156 and *C. albicans* genomes (Figure 1G, left). Assuming that cross-species doublets make  
157 up half of all doublets (a similar number of barcodes would contain two *S. cerevisiae* cells  
158 or two *C. albicans* cells), we estimate the doublet rate to be ~2.3% of all barcodes  
159 detected. Figure 1G, right shows a similar species-mixing experiment at  $\lambda = 0.15$  or 15%  
160 Poisson loading; across 8,080 cells detected, only 173 cells map to both genomes, giving  
161 a final doublet rate of ~4.2%. A Poisson loading of 15% was used for all *S. cerevisiae* and  
162 *C. albicans* experiments. We note that scRNA-seq of *S. cerevisiae* and *C. albicans* in  
163 these species mixing experiments also demonstrate that mDrop-seq is capable of  
164 simultaneous single-cell profiling of a mix of different yeast species. This feature may be  
165 useful in characterizing fungal microbiome composed of multiple yeast species without  
166 the need to sort cells by species.

167

## 168 **Heterogeneity in heat shock response of *Saccharomyces cerevisiae* profiled using** 169 **mDrop-seq**

170 To test the efficacy of mDrop-seq in detecting transcriptional changes in yeast cells to  
171 external stimulus, *S. cerevisiae* cells were subjected to heat shock prior to running  
172 mDrop-seq. The heat shock is a widely conserved response in cells that involves  
173 expression of protein chaperones.[26] The cells underwent a 20-minute heat shock at 42  
174 °C and then were chilled on ice before running mDrop-seq. The *S. cerevisiae* dataset  
175 shown previously in Figure 1D was used as the control dataset to the heat shock  
176 experiments.

177 Two replicate experiments on heat shock stimulation were performed. We see significant  
178 similarity in expression data with Pearson correlation of 0.96. The second replicate saw  
179 an increase in genes and UMI detected (587 and 1053, respectively), seen in Figure 2A.  
180 In PC space, the replicates cluster closely but separately from one another (Figure S4C).  
181 The mDrop-seq replicate experiments were performed on different days to characterize  
182 the heat shock response of *S. cerevisiae*, using independent cell cultures grown from the  
183 same stock.

184 Compared to the control, we see the upregulation of several stress response genes (the  
185 mean expression of the control and heat-shock data show Pearson correlation of 0.74;  
186 see Figure 2B). UMAP of the control and heat-shock datasets shows distinct clusters of  
187 heat-shocked and unstimulated cells (Figure 2C). While the heat-shock replicates cluster  
188 separately, they appear closer together on the UMAP, compared to the controls.

189 Next, we ordered the genes in the control and heat-shock datasets by descending log  
190 fold change (logFC). For many of these genes, the p-values are small (Wilcoxon Rank  
191 Sum test, adj-p < 1e-10, Bonferroni correction) with many adj-p < 2.225e-308 (lowest  
192 value reported on Seurat). Among the genes induced in cells under heat-shock compared  
193 to control, we see several genes involved in heat-shock related stress response, such as  
194 *HSP12* (logFC = 1.78) as well as other heat-shock protein (HSP) family genes associated  
195 with other types of stress response (Figure 2D). Protein transport genes, such as *KAR2*  
196 (logFC = 2.49), are also highly expressed under heat-shock (Figure S4A). We also see  
197 significant differential expression in genes marked for cell stress, such as *RTC3*, *NCE103*  
198 (logFC = 2.68, 2.51, respectively) involved in DNA replication stress (Figure S4B). House-  
199 keeping genes, such as actin (*ACT1*), histone genes (*HTB1*), ribosomal genes, and



200 glycolysis genes (Figure 2E) are present in both datasets, with slightly higher expression  
201 (logFC = 0.6, 1.1, and 1.5 for *HTB2*, *ACT1*, and *RPP2B*, respectively) in the control  
202 dataset. These results suggest that mDrop-seq has the power to detect cellular responses  
203 to stimuli on a single cell level.

204

### 205 **Activation of stress response in *S. cerevisiae* under heat shock**

206 To investigate the sequence of activation in stress response genes in SC under heat  
207 shock, we applied trajectory analysis [27] on a subset of control and heat-shock SC data.  
208 Three datasets, SC\_15min\_Rep2, SC\_20min\_Rep2 and SC\_HeatShock\_Rep2 were  
209 integrated (Figure S3A) and cell-cycle module scores were assigned to each cell, using  
210 Seurat. We then used Monocle v2 [27] to infer the expression changes during heat shock  
211 in pseudo-time (Figure 2F-H). Figure 2F shows the trajectory where the control samples,  
212 SC\_15min\_Rep2, SC\_20min\_Rep2 overlapped with each other, while the heat shock  
213 sample SC\_HeatShock\_Rep2 diverged into two separate branches indicative of two  
214 distinct pseudo-states. When marked by each cell's cell-cycle phase (Figure 2G), we note  
215 that S phase cells dominated the heat-shock sample, as before; both branches of the  
216 trajectory taken by the heat shock sample are dominated by S phase cells. On the other  
217 hand, the G1, S and G2M phases largely overlap for the control samples, as seen  
218 previously. Next we compared the cell-type clustering results with trajectory analysis.  
219 Figure 2H shows the pseudo-time trajectory where each cell is colored according to the  
220 unsupervised clusters in Figure S3A. The UMAPs in Figure S3B show the contribution of  
221 each sample to the overall clustering: we note that cells in cluster 0 come mostly from the  
222 control samples (left, middle) and cluster 2 is composed of cells primarily from the heat-

223 shocked sample (right). These results are consistent with Figure S3D where cells in  
224 cluster 0 predominantly occur in control samples (left, middle) and cluster 2 in the heat-  
225 shock sample (right). DE analysis was performed on the two branches of the heat-  
226 shocked sample using Wilcoxon Rank Sum test in Seurat. The expression level in the  
227 logarithmic scale was visualized using color gradient on the trajectory tree plot (Figure  
228 S3E). Heat shock genes such as *HSC82*, *HSP12* and *HSP82* (Figure S3E, left, middle,  
229 right) are differentially expressed between the two branches of the trajectory indicating  
230 differential response in *S. cerevisiae* cells to heat shock.

231

### 232 **Characterizing expression heterogeneity in *Candida albicans* using mDrop-seq**

233 To demonstrate the utility of mDrop-seq in profiling different yeast species, we applied  
234 mDrop-seq to *Candida albicans*. *C. albicans* is a common hospital-acquired infection that  
235 can be life-threatening.[28] This yeast has several features that make it challenging for  
236 droplet single-cell profiling. Thicker cell walls in *C. albicans* compared to *S. cerevisiae*  
237 (~150 nm and ~120 nm, respectively [22]) make lysis of the *C. albicans* cell wall more  
238 difficult. This species also has a hyphal phenotype that can clog microfluidic channels  
239 and disrupt flow and droplet generation. The Droplet Yeast Lysis Buffer or DYLB (see  
240 **Methods**) used to lyse *S. cerevisiae* was insufficient for *C. albicans* (as assessed under  
241 a microscope). The *C. albicans* Lysis Buffer used in our experiments is similar to DYLB  
242 but with higher concentrations of both detergent and enzyme (see **Methods**). We  
243 performed two replicates of lysis experiments (15, 20, and 25 minutes) to establish the  
244 ideal incubation time for lysis and RNA capture of *C. albicans* after droplet encapsulation.  
245 The 25 minute lysis from the second replicate did not produce a library due to technical

246 error. Average counts varied between the five libraries (Table S1), consistent with lysis  
247 experiments performed in bulk. Gene cutoffs were determined for each lysis time and  
248 replicate; this ranged from 175 to 370. A total of 14,320 *C. albicans* cells were detected  
249 across datasets. Lysis time of 20 minutes outperformed the other lysis times in both  
250 replicates for gene and UMI capture (Table S1). We combined the 15 and 20-min  
251 incubation datasets from replicate 1 (CA\_20min\_Rep1 and CA\_25min\_Rep1) to  
252 construct a combined dataset with 4,006 cells, with lower and upper cutoffs of 220 and  
253 1600 genes per cell, shown in Figure S6. The 15-min lysis experiment yielded poor data  
254 that may be attributed to incomplete cell lysis, and was excluded from further analysis.  
255 In Replicate 2, 15 and 20-min libraries (CA\_15min\_Rep2 and CA\_20min\_Rep2) were  
256 also combined (Figure 3). The gene with highest expression, on average, is a white-phase  
257 yeast transcript *WH11* (Figure 3A). *C. albicans* in white phase is the generic, round yeast  
258 form, and expected when grown in rich medium [29], as opposed to the elongated, mating  
259 competent opaque phase.[30] These morphological forms favor growth unlike the *C.*  
260 *albicans*' filamentous hyphal form.[29] *TDH3*, a gene involved in glycolysis (that also  
261 showed the highest expression in *S. cerevisiae* data), is the fourth highest expressed  
262 gene in the *C. albicans* dataset in both replicates. Potentially due to the difference in  
263 genes and UMI detected, we see separation in PC space between CA\_15min\_Rep2 and  
264 CA\_20min\_Rep2 datasets in Figure 3D (Pearson correlation = 0.96), necessitating batch  
265 correction. We see several distinct clusters (clusters 2, 3, and 5) after batch correction in  
266 Figure 3E that separate out from the rest of the cells. A heatmap of the most significantly  
267 expressed genes in each cluster is shown in Figure 3I. The upper cluster 3 is marked by  
268 the expression of GPI-anchored cell wall genes such as *FGR41* and *PGA38* (Figure 3F).

269 Clusters 2 and 5 are heavily represented by histone tail genes as markers (Figure 3G),  
270 indicating that these clusters may represent variation caused by the cell cycle.  
271 Transcription factors *STP4* and *ADR1* encoding for zinc finger proteins and implicated in  
272 *C. albicans* virulence [31] and *GNP1*, a transmembrane transporter of amino acids are  
273 moderately expressed across the entire population (Figure 3H). *OLE1*, involved in  
274 filamentation, shows high expression across all cells, shown in Figure 3H. Figure S5  
275 shows UMAP plots of samples CA\_15min\_Rep2 and CA\_20min\_Rep2 without batch  
276 correction, where each cell is colored by unsupervised clusters, sample of origin and cell  
277 cycle phase in Figures S5A, B, C respectively. Figures S5D, E plot the expression levels  
278 of histone tail genes and GPI-anchored cell wall genes in this dataset.

279 To compare mDrop-seq of *C. albicans* with bulk RNA-seq, we performed a population-  
280 level RNA-seq experiment on *C. albicans*. Our population level RNA-seq data showed a  
281 modest Pearson correlation of 0.70 (Figure 3B) with pseudo-bulk [3] data constructed  
282 from mDrop-seq and 0.64 (Figure S6B) with a publicly available dataset of *C.*  
283 *albicans*. [27] The correlation between our population level data and the public dataset  
284 was 0.84, by comparison.

285

### 286 **Differential expression in *Candida albicans* in response to fluconazole exposure**

287 Fluconazole is an anti-fungal agent commonly used to treat infections from various  
288 *Candida* species. *C. albicans* cells were exposed to fluconazole over the course of 3  
289 hours, with samples taken for running mDrop-seq prior to exposure, at 1.5 hr and 3 hr.  
290 Fluconazole is a bis-triazole antifungal agent that binds to cytochrome P-450 to disrupt  
291 the conversion of lanosterol to ergosterol. [32] Previous experiments showed that *C.*

292 *albicans* responds to the presence of fluconazole in a variety of ways, such as increasing  
293 expression of the drug target genes, increasing drug efflux, and finding compensatory  
294 pathways for ergosterol biosynthesis.[33] We sampled a population of *C. albicans* cells  
295 before (as control) and after (1.5 and 3 hr) exposure to 15 µg/mL fluconazole, which is  
296 slightly higher than the C<sub>max</sub> dose of 400 mg.[34] These experiments were performed  
297 twice.

298 We saw an increase in UMI and genes detected per cell when exposed to fluconazole,  
299 across replicates (Figure 4A). Figure 4B shows a UMAP plot of the integrated dataset  
300 (control, 1.5 and 3 hr) from Replicate 1 with slight separation between the control and  
301 fluconazole-exposed samples. In contrast, there was very little separation between the  
302 samples at 1.5 and 3 hour fluconazole exposures. The mean gene expression of the  
303 control library yielded a Pearson correlation of 0.91 for the 1.5-hr and 0.88 with the 3-hr  
304 time points (Figure 4C).

305 When comparing the 1.5 and 3 hr time points of fluconazole treatment to the control, we  
306 saw significant upregulation of several ergosterol biosynthesis pathway genes that alter  
307 *C. albicans* susceptibility to different classes of antifungal drugs like azoles and  
308 allylamines.[35] Figure 4D shows six of these genes, with *ERG11* being the main drug  
309 target of fluconazole and *ERG1*, associated with terbinafine resistance [36] (LogFC =  
310 1.26, 1.71, 1.02, 1.53, 1.34, and 2.00 for *ERG11*, *ERG252*, *ERG1*, *ERG13*, *ERG10*, and  
311 *ERG6*, respectively). ABC transporters used for drug efflux, were not detected, likely due  
312 to the short duration of fluconazole treatment.[33] The fluconazole treated cells also  
313 showed increased expression of many histone genes (LogFC > 2) compared to control

314 (Figure S10A). Note that histone genes in yeasts have poly-adenylated tails, unlike in  
315 humans.[37]

316 Using DE analysis on the combined dataset, we identified the following genes of interest:  
317 DE genes that show higher expression in the fluconazole treated datasets, e.g., *CHT2*,  
318 *INO1*, *POL30*, *TNA1*, *RHD3*, *HXK2* (Figure 4E) including several antigenic genes and  
319 genes upregulated during a host immune response; DE genes that show increased  
320 expression in the control data that decreased with time under fluconazole treatment, e.g.,  
321 *ASR1*, *ASR2*, *WH11*, *HSP70*, *AHP1* (Figure 4F) associated with core and heat-shock  
322 specific stress responses; and DE genes that show highest expression transiently in the  
323 1.5 hr fluconazole treated sample, e.g., *MRV5*, *ADH2*, *SOD5*, *CAR1* (Figure 4G)  
324 associated with acid, osmotic and alkaline stress responses. Violin plots of housekeeping  
325 genes *ACT1*, *PDA1*, *TDH3*, and *PGK1* are shown in Figure S11B for comparison.

326 Next, we performed cell cycle analysis on the combined dataset (CA\_Fluconazole-ctrl,  
327 1.5, 3hr\_Rep1) from the control, 1.5 and 3 hr time points of the fluconazole treatment.  
328 The fluconazole treated datasets showed separation of S phase cells from the rest of the  
329 cells in PC space (Figure S10B). When colored by cell-cycle phase, the UMAP of the  
330 combined dataset (Figure 4H) showed some cell clustering by their assigned cell cycle  
331 phase. We also saw significant increase in the number of cells assigned to the S phase  
332 under fluconazole treatment (3.2x and 1.8x for 1.5 and 3 hr, respectively; Supplementary  
333 Table S2) with respect to the control dataset. Cells under stress tend to go into cell cycle  
334 arrest.[38] Increased expression of ERG genes has also been associated with slow  
335 growth in yeasts.[39] Since many histone genes occur in the list of marker genes for the  
336 S phase, we verified that high histone activity alone in the fluconazole-treated cells was

337 not skewing our cell cycle assignment towards the S phase (see **Analysis of cell cycle**  
338 **phases in *C. albicans*** in Supporting Material).

339 Unsupervised clustering of the combined CA\_Fluconazole\_Rep1 data after cell cycle  
340 effects were regressed out (Figure 4I) showed clusters of cells exhibiting histone activity  
341 (cluster 4), ribosome activity (clusters 4, 6), synthesis of ribonucleoproteins and Hap43  
342 induced proteins, along with reduction in iron metabolism (cluster 5; violin plots of  
343 expression for some genes in this cluster are shown in Figure S11C), stress response  
344 (cluster 7), synthesis of cell wall and vacuolar proteins (cluster 8), and nucleolar activity  
345 (cluster 9). When cells from each time-point were plotted separately (Figure S11A), we  
346 saw that some cell clusters were present predominantly in either control or fluconazole-  
347 treated time-points, e.g., clusters 5 and 7 in control, cluster 4 at 1.5 hr, and cluster 6 at 3  
348 hr. The number of cells in clusters 2 and 3 decreased monotonically between control, 1.5  
349 and 3 hr time-points. Similar analyses of fluconazole treated *C. albicans*, replicate 2 are  
350 shown in Figures S9 and S12A, B. These results show interesting variability in  
351 transcriptomic response between cells to fluconazole, potentially providing insight into  
352 differences in resistance between cells.

353

### 354 **Trajectory inference in fluconazole stimulation in *Candida albicans***

355 Since the fluconazole treatment led to steady changes in gene expression along the 3 hr  
356 time course, we attempted to capture the temporal changes in gene expression by  
357 constructing pseudo-time trajectories for the *C. albicans* stimulation, using Monocle, an  
358 R package.[27] We assumed the control (untreated) sample as time t=0 hr in the  
359 fluconazole treatment for this analysis. Figures 4J, K show the pseudo-temporal

360 trajectories of CA\_Fluconazole\_Rep1 response to fluconazole, marked by experimental  
361 time-point and cell-type clusters (identified by unsupervised clustering and shown in  
362 Figure 4I), respectively. Based on prior knowledge, the tip (bottom left) in Figure 4J was  
363 set as the starting point for pseudo-time construction. Occurrence of the untreated control  
364 (blue) on the left of trajectory in Figure 4J and the fluconazole treated samples (coral- 1.5  
365 hr; green- 3hr) to the right are consistent with the pseudo-time progression shown in  
366 Figure S11D, as inferred by Monocle. Figure S11E shows the increasing expression of  
367 *ERG10* and *ERG11* genes that mediate resistance to fluconazole and other antifungal  
368 agents along the trajectory.[38]

369 The contributions of each experimental time point to the different branches of the pseudo-  
370 time trajectory are shown in Figures S11F, G broken down by control (left), 1.5 hr (middle)  
371 and 3 hr (right) time points and marked by cell-type clusters and cell cycle stages,  
372 respectively. The branches to the left were predominantly composed of cells from the  
373 control sample. S phase assignment dominated the fluconazole treated cells (Figure  
374 S11G, middle, right), as seen from cell clustering.

375 Similar analyses of fluconazole treated CA, replicate 2 (CA\_Fluconazole\_Rep2) are  
376 shown in Figures S9 and S12. Again, the representation of each sample along the  
377 pseudo-time trajectory is consistent with experimental time points (Figure S9J), starting  
378 with control (left) cells at the tip and followed by 1.5 hr fluconazole-treated cells (middle)  
379 and 3 hr treated cells (right). Cells belonging to the S phase also dominate the fluconazole  
380 treated samples (Figure S12E, middle, right), as seen in replicate 1.



381 In summary, we show that pseudo-time analysis of CA exposed to fluconazole show that  
382 cell activation trajectory in pseudo-time can be used to infer the temporal sequence of  
383 gene expression in yeast cells under external stimuli.

384

## 385 **Discussion**

386 As noted earlier, single cell genomic analyses of microbial species have been difficult due  
387 to challenges in single cell lysis and low input material in microbial cells. Yeasts and other  
388 fungi have poly-adenylated tails on the 3' end of their mRNA, allowing selective mRNA  
389 capture using poly-dT oligonucleotides that is not possible in bacterial cells, making fungi  
390 more experimentally tractable among microbial species.

391 We established the feasibility of mDrop-seq to profile transcriptional heterogeneity in  
392 fungal species at single cell resolution and at scale by performing mDrop-seq on a total  
393 of 35,109 single cells of *S. cerevisiae* and 39,705 *C. albicans* cells across multiple  
394 replicates, experimental conditions and environmental stimuli in the form of heat-shock  
395 (*S. cerevisiae*) and fluconazole exposure (*C. albicans*). Based on Drop-seq and DroNc-  
396 seq [1],[21] used to profile gene expression in mammalian cells, mDrop-seq leverages  
397 existing single-cell experimental and computational tools and allows for lower barrier of  
398 entry and easy adaption of single cell RNA-seq on fungal species for labs that are set up  
399 for Drop-seq or similar workflows.

400

### 401 **Droplet content and stability**

402 To implement mDrop-seq, we needed to overcome the challenge of microbial cell lysis in  
403 emulsion drops, while maintaining droplet stability and RNA integrity for downstream

404 molecular biology reactions. This was accomplished by using a combination of zymolyase  
405 and Sarkosyl activity in drops, along with thermal incubation. The enzyme, zymolyase  
406 targets a common component of fungal cell walls and requires thermal activity; the  
407 detergent, Sarkosyl is a strong lytic agent that works ubiquitously on mammalian cells,  
408 zebrafish, *C. elegans* and fruit fly.[40]–[42] Different concentrations of zymolyase and  
409 Sarkosyl were used in the mDrop-seq lysis buffers for *S. cerevisiae* and *C. albicans* (see  
410 **Methods**), based on bulk and droplet-based lysis experiments on the two species. We  
411 posit that similar cocktails consisting of zymolyase and Sarkosyl will prove effective on a  
412 broad class of fungal species that share similar cell wall properties to *S. cerevisiae* and  
413 *C. albicans*, including clinically relevant species like *C. auris*. Anti-fungal peptides [43]  
414 that target specific components of the fungal cell wall may also be added to the lysis  
415 cocktail of zymolyase and Sarkosyl.

416 The stability of emulsion drops and efficacy of downstream reactions are affected by  
417 droplet contents. We note that a high concentration of detergent in the lysis buffers, e.g.,  
418 3.3% Sarkosyl in the *C. albicans* lysis buffer, is detrimental to stable droplet formation,  
419 necessitating lower flow rates on the microfluidic device. Since reverse transcription in  
420 mDrop-seq was performed outside microfluidic drops after the emulsion was broken  
421 following single cell lysis and mRNA capture on barcode beads in drops [1], [21], the  
422 compatibility of lysis buffer and reverse transcriptase was not an issue. The DYLB and *C.*  
423 *albicans* lysis buffer used in our experiments were optimized for the microfluidic device  
424 [21], oil-surfactant mix, and flow parameters used here. While stable droplets may be  
425 generated at higher flow-rates with other surfactants, we prefer the oil-surfactant mix used  
426 here due to its relatively low cost, long shelf-life and easy availability.

427

## 428 **Sequencing and alignment**

429 We used Illumina Paired End (PE) sequencing for mDrop-seq. Due to the relatively lower  
430 complexity of the yeast mDrop-seq libraries in general, or GC content bias (~37%, in *C.*  
431 *albicans* and (~41% in *S. cerevisiae*, reported by *FastQC*), we found it beneficial to  
432 sequence these libraries multiplexed with more complex libraries like those from human  
433 (~45%, from *FastQC*) or use higher Illumina PhiX concentration to improve the overall  
434 quality of sequencing runs.

435 The 20 bp long Read1 sequence was used to de-multiplex the cell barcode and UMI while  
436 the 60 bp Read2 was used to identify the 3' end of transcripts. While longer read lengths  
437 can help reduce multi-mapping in complex genomes such as the human at 3.1 Bb [44],  
438 yeast genomes are typically much smaller, e.g., 12 Mb for *S. Cerevisiae* [45] and 14.7 Mb  
439 for *C. albicans* [46]; transcripts with shorter read lengths (~30 bp) can be uniquely mapped  
440 to them. Figure S7A shows the percent of uniquely mapped reads (left) and reads  
441 mapping to multiple loci (right) as functions of Read2 fragment lengths for *S. cerevisiae*,  
442 *C. albicans* and human genomes. We also compared the effect of clipping the transcript  
443 fragments on the 3' vs. 5' ends on STAR [47] aligner and saw no noticeable difference in  
444 mapping rates between the two.

445 UMI identifies individual mRNA molecules, allowing us to collapse PCR replicates and  
446 prevent PCR bias. Across all mDrop-seq experiments, we saw ~30-120% more UMI  
447 compared to the number of genes detected, with higher percent UMI's detected in the  
448 heat-shock experiments in *S cerevisiae* or fluconazole treatment in *C albicans*, compared  
449 to their respective controls. The majority of genes being detected had only a single count

450 of transcript attributed to them. This is expected because most yeast genes are expressed  
451 as single copies of mRNA at any time.[23] This may make it difficult to differentiate  
452 between true variation and drop-outs in the data, a problem in scRNA-seq that is  
453 exacerbated in yeasts.

454

### 455 **Analysis of stress, heat shock and response to anti-fungal agent in yeast cells**

456 When comparing the control and heat shock sample in *S. cerevisiae*, we see a very clear  
457 heat shock response and notable separation in PC and UMAP space. This separation is  
458 primarily driven by upregulation of known heat shock genes along with genes involved in  
459 DNA replication stress (e.g., *KAR2*, *LST8*, *ERO1*) and protein transport (e.g., *RTC3*,  
460 *NCE103*, *TMA10*). Using a pseudo-time trajectory analysis, we clearly see progression  
461 from a non-stimulated control to the heat stimulated cells, with a branch point indicating  
462 two separate heat-shock responses. The most significant difference between these two  
463 branches is the differential expression of ribosomal structure (e.g. *RPL8B*, *RPL25*,  
464 *RPL36B*) vs. oxidative-reduction energetic processes (e.g. *PIG2*, *PCL8*, *GDB1*).

465 The *S. cerevisiae* data were normalized and batch-corrected to allow comparisons  
466 between experimental conditions, and categorized into three sub-groups: control,  
467 “stressed” control, and heat-shock, for comparison. We find the “stressed” control group  
468 to be intermediate between the control and heat-shock in that it showed an elevated  
469 stress-response signature for *HSP12*, *HSP26* and *HSP42* compared to the control set,  
470 but lower than the heat-shock data. In addition, the heat shock data showed expression  
471 of genes related to heat-shock stress, e.g., *HSP30*, and *PIN3*, DNA replication stress,  
472 e.g., *LST8*, *BTN2*, *ERO1*, and protein transport, e.g., *RTC3*, *TMA10* and *SPI1* that were

473 absent in the control and “stressed” control samples. We saw similar levels of  
474 transcription for housekeeping genes, e.g., *ACT1*, *HTB1*, *TDH2*, and *FBA1* across all  
475 groups. Also of interest are genes like *AIM44*, *PIR1*, *PST1*, and *EGT2*, associated with  
476 cell wall stability and cell budding that were expressed in a subset of cells clustering  
477 together in the control data.

478 Using gene lists specific to the G1, S and G2M phases to the cell-cycle, we scored and  
479 assigned each cell to a unique cell-cycle phase for both *S. cerevisiae* and *C. albicans*.  
480 Cells that could not be unambiguously assigned to any particular cell-cycle phase were  
481 marked as NA. In both heat shock and drug treatment experiments, we see significant  
482 decrease in the number of G2M phase cells (Supplementary Table S2) and an increase  
483 cell numbers assigned to the S phase. Since fluconazole treatment may be expected to  
484 elicit a stress response in yeasts, we propose that yeast cells are in general likely to get  
485 arrested in the S phase under stress.

486 Since fungal histone mRNA are polyadenylated [37] and thus amenable to mDropseq  
487 capture, we were able to characterize histone activity in *S. cerevisiae* and *C. albicans*.  
488 Overall, we saw significant differential expression of genes associated with histone  
489 activity in the cellular sub-sets identified by unsupervised clustering of both *S. cerevisiae*  
490 and *C. albicans* populations. The increase in the number of cells expressing histone  
491 genes in environmentally perturbed datasets may be due to stalling of the cell cycle in the  
492 S phase. The increase in the fraction of the cells belonging to the S phase may also be  
493 due to higher chromatin accessibility needed for increased transcription under stress  
494 response that drive up histone expression.

495 mDrop-seq on *C. albicans* cells exposed to the anti-fungal agent fluconazole showed  
496 significant increases in the number of counts and genes detected, compared to control  
497 data. Much of these increases appeared to be driven by increased expression of  
498 ribosomal structure genes (e.g., *RPS27*, *RPS6A*, *RPS12*). Across both replicates, we  
499 noted significant up-regulation of several genes belonging to the Ergosterol Biosynthesis  
500 pathway, including *ERG11* that produces the cytochrome P-450 target of fluconazole.  
501 The upregulation of this pathway is a known mechanism for resisting the membrane  
502 disruptive effects of fluconazole. We did not detect any upregulation of ABC transporter  
503 genes as mechanisms of resistance. During the 3 hr. exposure time, we also noted  
504 several genes that increased their expression transiently, increasing quickly in expression  
505 in 1.5 hr. before decreasing by the end of 3 hr. period. These genes included some stress-  
506 induced genes such as *SOD5* and *ADH2*, as well as *C1-08350C-A*, *C5-02110W-A*.  
507 After integrating the control and fluconazole treated data for each replicate, followed by  
508 cell cycle regression and clustering analysis, we noted that the signatures of ribosomal  
509 and histone expression differences persisted within the clusters. A cluster marked by GPI-  
510 anchored proteins was also seen in the integrated data, as well as a cluster involving  
511 nucleolar and pre-ribosomal genes.  
512 In particular, we noted increased histone activity in *C. albicans* under fluconazole  
513 exposure. Since many cell-cycle genes for the S phase in *C. albicans* are histone-related,  
514 we confirmed that the signal for the S phase assignment was preserved, compared to the  
515 G1 and G2M phases even when the histone genes were excluded from the S phase  
516 marker list ([Supplementary Material](#)). Since chromatin accessibility is needed for

517 increased transcription under stress response, this may drive up histone expression  
518 under heat shock in *S. cerevisiae* or fluconazole treatment in *C. albicans*.

519

## 520 **Scalability as a technology**

521 mDrop-seq offers cheap transcriptomic profiling solution for unicellular fungi and may be  
522 easily adapted in laboratories that use Drop-seq or similar techniques. Existing  
523 bioinformatics and statistical tools for single cell analyses may be effectively leveraged to  
524 analyze fungal species at single cell resolution. According to our estimate, the cost of  
525 single-cell library preparation using mDrop-seq is ~\$250 per sample (~5,000  
526 cells/sample). At ~50 million reads per sample, we estimate sequencing to cost an  
527 additional ~\$190 per experiment.

528

## 529 **Conclusion**

530 We introduce mDrop-seq, a droplet based RNA sequencing of fungal species at single  
531 cell resolution and high throughput. We applied mDrop-seq on two important yeast  
532 species, viz., *S. cerevisiae*, a model organism commonly used to study fundamental  
533 processes in biology, and *C. albicans*, a common, clinically relevant pathogen. We were  
534 able to identify cellular subsets and their expression profiles within the larger population  
535 that show cell-budding activity, histone synthesis, etc. To our knowledge, this is the first  
536 work that performs single-cell RNA-seq on *C. albicans* at high throughput. Modestly  
537 priced and based on established protocols that are easy to implement, we anticipate that  
538 mDrop-seq will be instrumental for understanding the basis on phenotypic and functional  
539 variability in fungal species in a wide range of contexts, including medical treatment of

540 fungal pathogens, understanding basic biological processes in model organisms, and  
541 production of biologics.

542

## 543 **Acknowledgment**

544 We thank Sean Crosson for help setting up *C. albicans* cell culture, Ashish Thakur for  
545 help designing bulk RNA-seq experiment, Samantha Keyport for help designing heat  
546 shock experiments and Aviv Regev, Carl de Boer and Sebastian Pott for discussions and  
547 feedback. This work was supported by NIH R21 AI144417-02, DP2 AI158157-01 and  
548 BSF 2017357 grants. RPR was supported by NIH U19AI110818 and 1R15AT009926-01.  
549 Next-Gen sequencing was performed at the University of Chicago Functional Genomics  
550 Facility and computational resources were provided by the University of Chicago  
551 Research Computing Center.

552



## 553 **Materials and Methods**

### 554 **Yeast strains and cell culture**

555 *Saccharomyces cerevisiae* (strain BY4741, Open Biosystems) cells were grown as a  
556 dense culture in YEPD (MP Biochemicals, #: MP114001022) at 27 °C overnight. The *S.*  
557 *cerevisiae* culture was heavily diluted (1:20) in fresh YEPD medium and grown for 4 hours  
558 at 27 °C, following which the cells were placed on ice and chilled.

559 *Candida albicans* (strain SC5314, ATCC) were grown in YEPD at 27 °C after heavy  
560 dilution (~1:375). After 20 hours of cell culture, *Candida albicans* cells were chilled on ice  
561 prior to processing using mDrop-seq.

562

### 563 **Heat shock stimulation of *S. cerevisiae***

564 After *S. cerevisiae* was grown in YEPD for 4 hours post dilution, cells were counted in  
565 YEPD using Neubauer Improved (NI) hemocytometer (InCyto, #DHC-N01-2). 700,000  
566 cells were aliquoted into a 1.7 mL microfuge tube and heat-shock stimulation was applied  
567 by placing the tube in an Eppendorf F1.5 Thermomixer set to 42 °C and 500 rpm for 20  
568 minutes. At the end of the heat shock incubation, the microfuge tube containing the *S.*  
569 *cerevisiae* cells were placed on ice for 5 minutes. The cells were then washed once with  
570 ice-cold 1X PBS (Teknova, #P0195) and 0.01% BSA (NEB, #B9000Sm), henceforth  
571 referred to as PBS-BSA, quickly recounted, and brought to a concentration of 700,000  
572 cells/mL in PBS-BSA. 10 µL of RNase Inhibitor was added to 1 mL of yeast cells in PBS-  
573 BSA and mDrop-seq was performed as described below. The emulsion droplets were  
574 collected on ice to preserve the heat shock signal during the droplet encapsulation period.

575 **Fluconazole stimulation of *Candida albicans***

576 After *C. albicans* was grown overnight in YEPD, 5 million cells were counted using a  
577 Neubauer Improved (NI) hemocytometer (InCyto, #DHC-N01-2) and diluted into 2 mL of  
578 fresh YEPD. 1 million cells were removed from this pool and put on ice as the control  
579 population and processed using mDrop-seq. Fluconazole (Sigma, #F8929-100MG) was  
580 freshly diluted to 100 µg/mL in fresh YEPD, and added to the remaining 4 million *C.*  
581 *albicans* to a final concentration of 15 µg/mL. The *C. albicans* was then incubated in  
582 fluconazole under end-over-end rotation at room temperature for 1.5 and 3 hr, removed  
583 and put on ice prior to running mDrop-seq.

584

585 **mDrop-seq cell preparation and co-encapsulation in droplets**

586 Yeast cells (*S. cerevisiae* or *C. albicans*) were centrifuged separately at 1000 xg for 3  
587 minutes in a swinging bucket centrifuge at 4 °C. The cells were washed twice with ice  
588 cold PBS-BSA. Following the washes, 10 µL of cells was sampled and counted using a  
589 NI hemocytometer (InCyto, #DHC-N01-2). ~1 mL of cells at 700,000 cells/mL suspended  
590 in PBS-BSA was placed in a 2.5 mL syringe (BD, #309657). 10 µL of RNase Inhibitor  
591 (Lucigen, #F83923) was added per 1 mL suspension immediately before microfluidic  
592 encapsulation. A 75 µm DroNc-seq device was used for droplet generation.[21] Cells and  
593 beads were co-flowed into the microfluidic device, both at 1.5 mL/hr for *S. cerevisiae* and  
594 1 mL/hr for *C. albicans*. Cells at 700,000 cells/mL and 4,500,000 droplets/mL gives a  
595 Poisson loading distribution with  $\lambda = 0.15$ .

596 Barcoded beads (ChemGenes, #Macosko-2011-10(V+)) were suspended in DYLB or *C.*  
597 *albicans* lysis buffers at 350,000 beads/mL and kept in suspension by constant stirring

598 with a magnetic tumble stirrer and flea-magnet setup (V&P Scientific, #VP 710, #772DP-  
599 N42-5-2); the flea magnet is placed in the syringe containing the barcode beads  
600 suspended in lysis buffer and the stirrer kept in the vicinity of the syringe during droplet  
601 generation. Cells and beads in lysis buffer were co-encapsulated in drops using a  
602 surfactant-oil mix (BioRad, #1864006) flowed at 8 mL/hr in a 10 mL syringe (BD, #302995)  
603 as the outer carrier oil phase. Droplets were collected at ~3750 droplets/sec for 30  
604 minutes in 50 mL tubes (Genesee Scientific, #28-106).

605 *Saccharomyces cerevisiae*: Barcoded beads were suspended in Droplet Yeast Lysis  
606 Buffer or DYLB, consisting of 6.7% (w/v) Ficoll PM-400 (GE Healthcare, #17-0300-05),  
607 225 mM Tris pH 7.5 (Teknova, #T2075), 22 mM EDTA (Fisher, #BP2482-500), 0.67%  
608 Sarkosyl (Teknova, #S3377), 55 mM KH<sub>3</sub>PO<sub>4</sub> (Sigma, #P5629-25G), 1.3 mM DTT  
609 (Teknova, #D9750), 0.1% (v/v) β-mercaptoethanol (Sigma, #M6250-10ML), and 450  
610 units/mL zymolyase (Zymo Research, #E1005); this mix was optimized for *S. cerevisiae*  
611 lysis in drops.

612 *Candida albicans*: Barcode beads were suspended in *C. albicans* lysis buffer containing  
613 6.7% Ficoll PM-400 (GE Healthcare, #17-0300-05), 225 mM Tris pH 7.5 (Teknova,  
614 #T2075), 22 mM EDTA (Fisher BP2482-500), 3.3% (w/v) Sarkosyl (Teknova, #S3377),  
615 55 mM KH<sub>3</sub>PO<sub>4</sub> (Sigma, #P5629-25G), 1.3 mM DTT (Teknova, #D9750), 0.1% (v/v) β-  
616 mercaptoethanol (Sigma, #M6250-10ML), 650 units/mL zymolyase (Zymo Research,  
617 #E1005), that was optimized for lysing *C. albicans* in drops.

618 *S. cerevisiae* and *C. albicans* species mixing: Each yeast cell population, *S. cerevisiae* or  
619 *C. albicans* were processed separately as follows: Each yeast species was centrifuged  
620 at 1000 xg for 3 minutes in a 4 °C swinging bucket centrifuge and washed twice with ice

621 cold PBS-BSA. Following the washes, 10  $\mu$ L of each cell aliquot was sampled from each  
622 species and counted using a NI hemocytometer.

623 Two experiments at two different Poisson loading concentrations, were performed to  
624 calculate doublet rates at these loading conditions: 175,000 cells from each species were  
625 combined and the final volume adjusted to 1 mL of PBS-BSA for  $\lambda \approx 0.077$ ; 350,000 cells  
626 from each species were suspended in a total volume of 1 mL PBS-BSA for  $\lambda \approx 0.15$ . Due  
627 to the presence of *C. albicans*, the stronger *C. albicans* lysis buffer was used for both  
628 experiments.

629

### 630 **Cell lysis, reverse transcription, cDNA amplification and Nextera library generation** 631 **for mDrop-seq**

632 After droplet collection, the 50 mL tubes were transferred to a 37 °C water bath for  
633 zymolyase digestion and lysis for ~20 minutes; different lysis incubation times ranging  
634 from 10-25 mins were tested, both for *S. cerevisiae* and *C. albicans*. After the incubation,  
635 the Drop-seq protocol was followed for breaking droplets, collecting barcode beads with  
636 mRNA hybridized onto them and washing them in 6x Saline-Sodium Citrate (Teknova,  
637 #S0282).[1] Reverse transcription was performed in 1.5 mL microfuge tubes under end-  
638 over-end rotation using a modified Reverse Transcription mix (1x Maxima H- RT buffer,  
639 4% Ficoll PM-400 (GE Healthcare, #17-0300-05), 3 mM MgCl<sub>2</sub> (Sigma, #M1028), 1 M  
640 Betaine (Sigma, #14300), 1 mM dNTPs (Clontech, #639125), 1 U/ $\mu$ L Rnase Inhibitor  
641 (Lucigen, #F83923), 2.5  $\mu$ M Template-Switching Oligo primer,  
642 (AAGCAGTGGTATCAACGCAGAGTGAATrGrGrG), and 10 U/ $\mu$ L Maxima H- RT enzyme  
643 (ThermoScientific, #EP0751) with a 30-minute incubation at room temperature, followed

644 by a 90-minute incubation at 50 °C. This generated barcoded cDNA affixed to the  
645 barcoded beads referred to as Single Transcriptome Attached to MicroParticles or  
646 STAMPs. The beads were then washed once in 0.5% SDS (Teknova, #S0288), twice in  
647 0.02% Tween 20 (Teknova, #T0710) both prepared in TE buffer (Teknova, #T0228), and  
648 treated with Exonuclease I digestion (Fisher, #M0293L). The total number of STAMPs  
649 collected was counted manually under the microscope. cDNA amplification was  
650 performed on RNA-DNA conjugates attached to ~120,000 barcode beads in a 96-well  
651 plate (Genesee Scientific, #24-302) loaded at 10,000 STAMPs per well. The STAMPs  
652 were amplified for 17 PCR cycles, using Kapa Hifi Hotstart 2x Mastermix (Fisher,  
653 #NC0465187) and SMART PCR primer (AAGCAGTGGTATCAACGCAGAGT).[1] Post-  
654 PCR cleanup was performed by removing the STAMPs and pooling the supernatant from  
655 the wells together into a single 1.7 mL low-retention tube (Genesee Scientific, #22-281LR)  
656 along with 0.6X Ampure XP beads (Beckman Coulter, #A63880).[1] After adding the  
657 Ampure beads to the PCR product, the tube was incubated at room temperature for 2  
658 minutes on a thermomixer (Eppendorf Thermomixer C, #5382000023) set to 1250 rpm,  
659 and for another 2 minutes on bench for stationary incubation. Next, the tube was placed  
660 on a magnet, and washed 4X times using 1 mL ethanol (Sigma, #E7023) at 80%  
661 concentration in each wash. cDNA was eluted in ultra-pure water (Life Tech, #10977-023)  
662 at 2.5 µL/well and the concentration and library size were measured using Qubit 3  
663 fluorometer (Thermo Fisher) and BioAnalyzer High Sensitivity Chip (Agilent, #5067-  
664 4626). Representative traces of cDNA libraries of *S. cerevisiae* and *C. albicans* are shown  
665 Figure S13A, B respectively.

666 500 pg of the cDNA library was used in Nextera library preparation, following the original  
667 Drop-seq protocol, with a 3-minute 72 °C incubation step added at the beginning of the  
668 thermo-cycling program to yield Nextera libraries averaging 500-700 bp. [1], [21]

669

670 **Population level RNA-seq library preparation of *Saccharomyces cerevisiae* and**  
671 ***Candida albicans***

672 We performed the same standardized procedure to prepare bulk RNA-seq libraries for *S.*  
673 *cerevisiae* and *C. albicans* as follows: We lysed ~8,000,000 cells each using DYLB (*S.*  
674 *cerevisiae*) and *C. albicans* lysis buffer (*C. albicans*) and incubation at 37 °C for 20 mins.  
675 Total RNA was extracted from each lysate using the Direct-zol RNA Miniprep Plus kit  
676 (Zymo Research, #R2071), assessed RNA quality using Qubit HS RNA Assay  
677 (Invitrogen, #Q32852) and diluted to 25 pg/μL. The total RNA library was annealed to 5'-  
678 AAGCAGTGGTATCAACGCAGAGTACTTTTTTTTTTTTTTTTTTTTTTTTTTTTTTTTTTTN-3'  
679 primer (IDT) that allow polyA selection of mRNA and template switching, similar to Drop-  
680 seq. Briefly, 11 μL of total RNA library was mixed with 11 μL of 10 μM primer above, 11  
681 μL of 10 mM dNTP (Takara, #639125), 13.75 μL of ultra-pure water and 2.75 μL of RNase  
682 Inhibitor (Fisher, #NC1081844), and incubated at 75 °C for 3 mins on a PCR  
683 thermocycler. A reverse transcription master-mix consisting of 11 μL of 5X Maxima RT  
684 buffer, 2.2 μL of H<sub>2</sub>O, 11 μL of 5 M Betaine (Sigma, #14300-500G), 1.65 μL of 100 mM  
685 MgCl<sub>2</sub> (Sigma, #M1028), 2.2 μL of 50 μM Drop-seq TSO primer (IDT), 1.1 μL of RNase  
686 inhibitor (Fisher, #NC1081844) and 2.75 μL of Maxima H-RTase enzyme (Fisher,  
687 #FEREP0753) was added immediately after the annealing step. The final RT reaction  
688 volume of 45 μL was pipetted several times to mix, centrifuged briefly to spin down the

689 contents and incubated on a PCR thermocycler using the following program: 42 °C for 90  
690 min; 5 cycles\*(42 °C for 2 min, 50 °C for 2 min); 70 °C for 15 min, to perform reverse  
691 transcription of the polyadenylated mRNA selectively annealed to the primer above. The  
692 cDNA was amplified for 12 cycles for *S. cerevisiae*, and 13 cycles for *C. albicans*, using  
693 Drop-seq TSO-PCR primer (IDT) and KAPA HiFi HotStart ReadyMix PCR Kit (Fisher,  
694 #NC0465187K). Amplified cDNA was quantified using Qubit and BioAnalyzer, followed  
695 by Nextera library generation.

696

## 697 **Sequencing**

698 Nextera libraries of samples, including bulk RNA-seq, were loaded at ~ 15 pM  
699 concentration and sequenced on an Illumina NextSeq 500 using the 75 cycle v3 kits for  
700 paired-end sequencing. 20 bp were sequenced for Read 1, 60 bp for Read 2 using  
701 Custom Read 1 primer, GCCTGTCCGCGGAAGCAGTGGTATCAACGCAGAGTAC,  
702 according to protocol. Due to the low complexity of yeast cDNA libraries, Illumina PhiX  
703 Control v3 Library was added at 5-10% of the total loading concentration for all  
704 sequencing runs. Samples for each experiment were loaded at 7-15% of a NextSeq 500  
705 lane and yielded 10-40 million reads for each sample. Some samples were sequenced  
706 twice, depending on library complexity. For these samples, the Fastq files were  
707 concatenated using the UNIX `zcat` function before running the *dropRunner* pipeline.  
708 Data are available at: <https://www.ncbi.nlm.nih.gov/geo/query/acc.cgi?acc=GSE154515>

709

## 710 **mDrop-seq data preprocessing, alignment and quality control**

711 There were ~5000-10,000 cells processed per sample and each library was sequenced  
712 at ~40-90 million reads. We developed a *Snakemake* [48] protocol called *dropRunner* that  
713 takes paired-end reads in FASTQ format as input and produces an expression matrix  
714 corresponding to the UMI of each gene in each cell. The protocol initially performs *FastQC*  
715 [49] to obtain a report of read quality. The reports are later inspected manually to ensure  
716 high-quality reads were generated. Next, it creates a whitelist of cell barcodes using  
717 *umi\_tools* [50] 0.5.3, which is a list of the top 10,000 valid cell barcodes in terms of number  
718 of reads. Next, reads were aligned to the respective yeast genomes using *STAR* [47]  
719 2.7.0a. *STAR* 2.7 introduced *STARsolo*, a turnkey solution for processing droplet single-  
720 cell RNA-seq data built directly into the *STAR* aligner. The whitelist and paired-end reads  
721 are used as input for *STARsolo*, which performs alignment, gene UMI counting, and cell-  
722 barcode-filtering in one step. *STARsolo* uses a heuristic approach for filtering cells with  
723 low or noise-level UMI counts. It does so by constructing a UMI count rank plot for each  
724 cell (a knee-plot) and picks a cut-off based on the knee of the curve. The pipeline can be  
725 found at GitHub (aselewa/dropseqrunner). The filtered digital expression matrices from  
726 *STARsolo* were loaded in Seurat (v3.1.1), an *R* package for downstream single cell  
727 transcriptome analyses.

728 All data from *S. cerevisiae* were aligned to the *Saccharomyces cerevisiae* (SC) reference  
729 genome, version sacCer3\_s288c (<https://www.yeastgenome.org/strain/S288C>) obtained  
730 from the *Saccharomyces* Genome Database (SGD), along with gene lists for each cell  
731 cycle. *C. albicans* data aligned to *Candida albicans* SC5314 (CA) reference genome,



732 version A21-s02-m09-r10

733 ([http://www.candidagenome.org/download/gff/C\\_albicans\\_SC5314/Assembly21/](http://www.candidagenome.org/download/gff/C_albicans_SC5314/Assembly21/)).

734

### 735 **Bulk RNA-seq data processing**

736 Two sets of bulk RNA-seq data obtained from *S. cerevisiae* and *C. albicans* were  
737 assessed for read quality using *FastQC*, mapped to the respective genomes described  
738 above using *STAR* 2.7.0a aligner [47], and RNA counts were generated from the bam  
739 files using *FeatureCounts* [51]. Read lengths were down-sampled during alignment using  
740 the *STAR* aligner, '--clip3pNbases' and '--clip5pNbases' parameters. Count matrices for  
741 the two yeast species were compared to their corresponding mDrop-seq datasets using  
742 the Seurat package.

743

### 744 **Clustering cells and generating UMAP**

745 We followed the analysis pipeline recommended by Seurat. Data were normalized and  
746 scaled using default commands provided by the Seurat package in R. Seurat was used  
747 to calculate the gene dispersion and mean expression to find highly variable genes. This  
748 reduces the computational time of PCA compared to using the full set of genes. Highly  
749 variable genes were used to calculate the PCs for the yeast mDrop-seq data. An elbow  
750 plot displaying the variation explained by each PC was used to determine the number of  
751 PCs needed to explain the majority (>90%) of the variation. The top PCs determined in  
752 this way were used to perform clustering which was visualized with Uniform Manifold  
753 Approximation and Projection (UMAP) [24].

754

755 **Calculating doublet rates from species mixing experiments**

756 An mDrop-seq dataset containing a mix of *S. cerevisiae* and *C. albicans* cells was aligned  
757 once to the SC genome and again separately, to the CA genome. Cells were removed  
758 based on data quality. The 7% Poisson loading experiment had gene cutoffs of 50 for  
759 both experiments, while the 15% Poisson loading experiment had cutoffs of 275 and 400  
760 for *S. cerevisiae* and *C. albicans*, respectively. We identify cell barcodes that capture  
761 genes from both SC and CA genomes. Due to the similarities between the yeast genomes  
762 caused by shared ancestry, there are genes that will map to both species. This was  
763 checked for by taking a *C. albicans* dataset and mapping it to the SC genome, and vice  
764 versa, to identify the genes common to both species. After removing these common  
765 genes from the mixed-species dataset, we identified the cell barcodes that show  
766 significant mapping (> 50 genes) to both genomes as true doublets.

767

768 **Batch correction**

769 Dataset merging and batch correction were performed using the *Anchor Integration*  
770 function in the Seurat package. Datasets were independently normalized and had highly  
771 variable genes detected using gene dispersion and mean expression. The datasets were  
772 scaled before running *Canonical Correlation Analysis* (CCA) function in Seurat to  
773 determine dataset anchors and merge the objects. A new integrated dataset was then  
774 created using the detected anchors. This integrated dataset was used for dimensional  
775 reduction and clustering analyses.

776

## 777 **Cell cycle analysis**

778 Lists of genes that serve as cell cycle phase markers for G1, S, and G2M phases were  
779 obtained from Spellman et al.,[52] for *S. cerevisiae* and the candida genome database  
780 for *C. albicans*. [53] Cell cycle assignment was made based on the G1, S, and G2M  
781 markers for cell-cycle phases. The *AddModuleScore* function implemented in Seurat was  
782 used to calculate cell-cycle score for each phase. This function sampled random genes  
783 as a control set; the number of the genes in the control set was determined by the number  
784 of markers in the cell-cycle gene lists. Since there were three such lists of markers, the  
785 minimum size of cell-cycle marker lists was used. For each cell, the largest module score  
786 was selected among the three phases and the corresponding cell cycle phase for the  
787 selected module score was assigned to the cell. A threshold on the selected module score  
788 was applied to ensure the cell cycle assignment was robust. If all module scores for a cell  
789 were below zero, the phase for the cell was left undecided and counted as 'Not Assigned'  
790 or NA in Supplementary Table S2.

791 This module score list was used with Seurat to create a column in the object metadata  
792 containing the assigned cell-cycle phase. Cell-cycle phase metadata was used to  
793 calculate PCs instead of highly variable genes. Cell-cycle variation was regressed out  
794 during data scaling and centering. The expression percentage and level for the G1, S,  
795 and G2M marker genes were visualized using dot plots where the size of the dots  
796 indicates the percentage of cells expressing a marker and the color intensity reflects  
797 normalized expression.

## 798 **Hierarchical clustering of cells**

799

800 To investigate variations in single cell expression that are not related to cell division and  
801 proliferation, the cell cycle effects were removed when scaling the gene expression per  
802 cell. The module scores for each of the G1, S, and G2M phases were regressed out  
803 against each gene. PCs and Shared Nearest Neighbor (SNN) graph [54] were  
804 constructed from the scaled gene expression matrix.

805

### 806 **Trajectory analysis on single-cell data**

807

808 To trace the lineage or process of temporal activation in yeast cells in response to external  
809 stimuli such as heat shock or fluconazole treatment, the trajectory analysis [27] was  
810 performed on the single-cell data from control and stimulated cells. Datasets from  
811 different conditions/time-points were integrated using anchor-based integration described  
812 above. The R-based pipeline, Monocle 2 (v 2.10) was used to process the data and  
813 construct the trajectory.

814 The genes used to order cells along the pseudo-time trajectory, or ordering genes, were  
815 set based on differentially expressed (DE) genes obtained from unsupervised clustering  
816 in Seurat. DE genes with q-value < 0.01 were selected as the ordering genes in Monocle.  
817 The count matrix was log-transformed after adding one to the counts to eliminate  
818 logarithms of zero values. PCA was performed on the normalized count matrix using the  
819 ordering genes and the top variable PCs were selected based on the scree plot of  
820 variance explained per component. The PCs were reduced into a tree structure by  
821 Discriminative Dimensionality Reduction with Trees (DDRTree).[55] The backbone of the  
822 tree branches formed the cell trajectory. The root of the trajectory was set as the tip of the  
823 tree branch that contained the largest number of cells from the control sample, and each

824 cell was ordered in pseudo-time based on the root. During the PCA and DDRTree  
825 dimension reduction phases, we removed any cell cycle effects by specifying the G1, S,  
826 and G2M module scores obtained from Seurat as variables to be linearly subtracted from  
827 the data to look for changes in gene expression that are independent of cell-cycle effects  
828 as response of external stimuli.

829

## 830 **References**

- 831 [1] E. Z. Macosko *et al.*, “Highly parallel genome-wide expression profiling of individual  
832 cells using nanoliter droplets,” *Cell*, vol. 161, no. 5, pp. 1202–1214, 2015.
- 833 [2] T. S. Andrews and M. Hemberg, “Identifying cell populations with scRNASeq,” *Mol.*  
834 *Aspects Med.*, vol. 59, pp. 114–122, 2018.
- 835 [3] P. A. Szabo *et al.*, “Single-cell transcriptomics of human T cells reveals tissue and  
836 activation signatures in health and disease,” *Nat. Commun.*, vol. 10, no. 1, 2019.
- 837 [4] A. Raj and A. van Oudenaarden, “Nature, Nurture, or Chance: Stochastic Gene  
838 Expression and Its Consequences,” *Cell*, vol. 135, no. 2, pp. 216–226, Oct. 2008.
- 839 [5] G. X. Y. Zheng *et al.*, “Massively parallel digital transcriptional profiling of single  
840 cells,” *Nat. Commun.*, vol. 8, 2017.
- 841 [6] Y. Zhang, J. Gao, Y. Huang, and J. Wang, “Recent Developments in Single-Cell  
842 RNA-Seq of Microorganisms,” *Biophys. J.*, vol. 115, no. 2, pp. 173–180, 2018.
- 843 [7] A.-E. Saliba, S. C Santos, and J. Vogel, “New RNA-seq approaches for the study  
844 of bacterial pathogens,” *Curr. Opin. Microbiol.*, vol. 35, pp. 78–87, Feb. 2017.
- 845 [8] N. A. R. Gow and B. Hube, “Importance of the *Candida albicans* cell wall during  
846 commensalism and infection,” *Curr. Opin. Microbiol.*, vol. 15, no. 4, pp. 406–412,  
847 2012.
- 848 [9] G. Lesage and H. Bussey, “Cell wall assembly in *Saccharomyces cerevisiae*,”  
849 *Microbiol. Mol. Biol. Rev.*, vol. 70, no. 2, pp. 317–343, Jun. 2006.
- 850 [10] T. J. Silhavy, D. Kahne, and S. Walker, “The bacterial cell envelope,” *Cold Spring*  
851 *Harb. Perspect. Biol.*, vol. 2, no. 5, p. a000414, May 2010.
- 852 [11] Y. Kang, M. H. Norris, J. Zarzycki-Siek, W. C. Nierman, S. P. Donachie, and T. T.  
853 Hoang, “Transcript amplification from single bacterium for transcriptome analysis,”  
854 *Genome Res.*, vol. 21, no. 6, pp. 925–935, 2011.
- 855 [12] D. Zenklusen, D. R. Larson, and R. H. Singer, “Single-RNA counting reveals  
856 alternative modes of gene expression in yeast,” *Nat. Struct. Mol. Biol.*, vol. 15, no.  
857 12, pp. 1263–1271, 2008.
- 858 [13] M. Nadal-ribelles, S. Islam, W. Wei, and P. Latorre, “Sensitive high-throughput  
859 single-cell RNA-Seq reveals within-clonal transcript-correlations in yeast  
860 populations,” *Nat. Microbiol.*, vol. 4, no. 4, pp. 683–692, 2019.

- 861 [14] V. Parelho *et al.*, “Cohesins Functionally Associate with CTCF on Mammalian  
862 Chromosome Arms,” *Cell*, vol. 132, no. 3, pp. 422–433, 2008.
- 863 [15] C. A. Jackson, D. M. Castro, G. Saldi, R. Bonneau, and D. Gresham, “Gene  
864 regulatory network reconstruction using single-cell RNA sequencing of barcoded  
865 genotypes in diverse environments,” *Elife*, vol. 9, pp. 1–34, 2020.
- 866 [16] M. A. Pfaller and D. J. Diekema, “Epidemiology of invasive candidiasis: A persistent  
867 public health problem,” *Clin. Microbiol. Rev.*, vol. 20, no. 1, pp. 133–163, 2007.
- 868 [17] P. Muñoz *et al.*, “*Saccharomyces cerevisiae* Fungemia: An Emerging Infectious  
869 Disease,” *Clin. Infect. Dis.*, vol. 40, no. 11, pp. 1625–1634, Jun. 2005.
- 870 [18] F. L. Mayer, D. Wilson, and B. Hube, “*Candida albicans* pathogenicity  
871 mechanisms,” *Virulence*, vol. 4, no. 2, pp. 119–128, 2013.
- 872 [19] “Centers for Disease Control and Prevention: Antibiotic Resistance Threats in the  
873 United States, 2019,” 2019.
- 874 [20] B. R. Levin and D. E. Rozen, “Non-inherited antibiotic resistance.,” *Nat. Rev.*  
875 *Microbiol.*, vol. 4, no. 7, pp. 556–562, Jul. 2006.
- 876 [21] N. Habib *et al.*, “Massively parallel single-nucleus RNA-seq with DroNc-seq,” *Nat.*  
877 *Methods*, vol. 14, no. 10, pp. 955–958, 2017.
- 878 [22] F. M. Klis, C. G. de Koster, and S. Brul, “Cell wall-related biomarkers and  
879 bioestimates of *Saccharomyces cerevisiae* and *Candida albicans*.,” *Eukaryot. Cell*,  
880 vol. 13, no. 1, pp. 2–9, Jan. 2014.
- 881 [23] F. Miura *et al.*, “Absolute quantification of the budding yeast transcriptome by  
882 means of competitive PCR between genomic and complementary DNAs,” *BMC*  
883 *Genomics*, vol. 9, no. 1, p. 574, 2008.
- 884 [24] L. McInnes, J. Healy, N. Saul, and L. Großberger, “UMAP: Uniform Manifold  
885 Approximation and Projection,” *J. Open Source Softw.*, vol. 3, no. 29, p. 861, 2018.
- 886 [25] A. Silva *et al.*, “Regulation of transcription elongation in response to osmostress,”  
887 *PLoS Genet.*, vol. 13, no. 11, pp. 1–24, 2017.
- 888 [26] K. Richter, M. Haslbeck, and J. Buchner, “The Heat Shock Response: Life on the  
889 Verge of Death,” *Mol. Cell*, vol. 40, no. 2, pp. 253–266, 2010.
- 890 [27] X. Qiu *et al.*, “Reversed graph embedding resolves complex single-cell trajectories,”  
891 *Nat. Methods*, vol. 14, no. 10, pp. 979–982, 2017.

- 892 [28] J. Kim and P. Sudbery, "Candida albicans, a major human fungal pathogen," *J.*  
893 *Microbiol.*, vol. 49, no. 2, pp. 171–177, 2011.
- 894 [29] B. Slutsky, M. Staebell, J. Anderson, L. Risen, M. Pfaller, and D. R. Soll, "'White-  
895 opaque transition': A second high-frequency switching system in Candida  
896 albicans," *J. Bacteriol.*, vol. 169, no. 1, pp. 189–197, 1987.
- 897 [30] C.-Y. Lan *et al.*, "Metabolic specialization associated with phenotypic switching in  
898 Candidaalbicans.," *Proc. Natl. Acad. Sci. U. S. A.*, vol. 99, no. 23, pp. 14907–14912,  
899 Nov. 2002.
- 900 [31] J. F. Muñoz *et al.*, "Coordinated host-pathogen transcriptional dynamics revealed  
901 using sorted subpopulations and single macrophages infected with Candida  
902 albicans," *Nat. Commun.*, vol. 10, no. 1, 2019.
- 903 [32] J. D. Morrow, "Fluconazole: a new triazole antifungal agent.," *Am. J. Med. Sci.*, vol.  
904 302, no. 2, pp. 129–132, Aug. 1991.
- 905 [33] E. L. Berkow and S. R. Lockhart, "Fluconazole resistance in Candida species: a  
906 current perspective.," *Infect. Drug Resist.*, vol. 10, pp. 237–245, 2017.
- 907 [34] Pfizer, "DIFLUCAN (Fluconazole Tablets) (Fluconazole Injection - for intravenous  
908 infusion only) (Fluconazole for Oral Suspension)," *FDA drug label*, pp. 1–37, 2011.
- 909 [35] K. W. Henry, J. T. Nickels, and T. D. Edlind, "Upregulation of ERG genes in Candida  
910 species by azoles and other sterol biosynthesis inhibitors.," *Antimicrob. Agents*  
911 *Chemother.*, vol. 44, no. 10, pp. 2693–2700, Oct. 2000.
- 912 [36] R. Leber *et al.*, "Molecular mechanism of terbinafine resistance in *Saccharomyces*  
913 *cerevisiae*," *Antimicrob. Agents Chemother.*, vol. 47, no. 12, pp. 3890–3900, Dec.  
914 2003.
- 915 [37] K. Fahrner, J. Yarger, and L. Hereford, "Yeast histone mRNA is polyadenylated,"  
916 *Nucleic Acids Res.*, vol. 8, no. 23, pp. 5725–5737, Dec. 1980.
- 917 [38] J. I. Castrillo *et al.*, "Growth control of the eukaryote cell: a systems biology study  
918 in yeast.," *J. Biol.*, vol. 6, no. 2, p. 4, 2007.
- 919 [39] S. Bhattacharya, B. D. Esquivel, and T. C. White, "Overexpression or Deletion of  
920 Ergosterol Biosynthesis Genes Alters Doubling Time, Response to Stress Agents,  
921 and Drug Susceptibility in *Saccharomyces cerevisiae*," *MBio*, vol. 9, no. 4, Jul.  
922 2018.



- 923 [40] Y. B. Tzur, E. Winter, J. Gao, T. Hashimshony, I. Yanai, and M. P. Colaiácovo,  
924 “Spatiotemporal Gene Expression Analysis of the *Caenorhabditis elegans*  
925 Germline Uncovers a Syncytial Expression Switch,” *Genetics*, vol. 210, no. 2, pp.  
926 587–605, 2018.
- 927 [41] J. A. Farrell, Y. Wang, S. J. Riesenfeld, K. Shekhar, A. Regev, and A. F. Schier,  
928 “Single-cell reconstruction of developmental trajectories during zebrafish  
929 embryogenesis,” *Science (80-. )*, vol. 360, no. 3692, 2018.
- 930 [42] M. M. Ariss, A. B. M. M. K. Islam, M. Critcher, M. P. Zappia, and M. V Frolov, “Single  
931 cell RNA-sequencing identifies a metabolic aspect of apoptosis in Rbf mutant,” *Nat.*  
932 *Commun.*, vol. 9, no. 5024, pp. 1–13, 2018.
- 933 [43] A. Matejuk *et al.*, “Peptide-based Antifungal Therapies against Emerging  
934 Infections.,” *Drugs Future*, vol. 35, no. 3, p. 197, Mar. 2010.
- 935 [44] V. A. Schneider *et al.*, “Evaluation of GRCh38 and de novo haploid genome  
936 assemblies demonstrates the enduring quality of the reference assembly,” *Genome*  
937 *Res.*, vol. 27, no. 5, pp. 849–864, 2017.
- 938 [45] “*Saccharomyces cerevisiae* (ID 15) - Genome - NCBI.” [Online]. Available:  
939 <https://www.ncbi.nlm.nih.gov/genome/?term=s+cerevisiae>. [Accessed: 21-May-  
940 2020].
- 941 [46] “*Candida albicans* (ID 21) - Genome - NCBI.” [Online]. Available:  
942 [https://www.ncbi.nlm.nih.gov/genome/?term=Candida albicans](https://www.ncbi.nlm.nih.gov/genome/?term=Candida%20albicans). [Accessed: 21-  
943 May-2020].
- 944 [47] A. Dobin *et al.*, “STAR: Ultrafast universal RNA-seq aligner,” *Bioinformatics*, vol.  
945 29, no. 1, pp. 15–21, 2013.
- 946 [48] J. Köster and S. Rahmann, “Snakemake-a scalable bioinformatics workflow  
947 engine,” *Bioinformatics*, vol. 28, no. 19, pp. 2520–2522, 2012.
- 948 [49] S. Andrews and Babraham Bioinformatics, “FastQC: A quality control tool for high  
949 throughput sequence data,” *Manual*. 2010.
- 950 [50] T. Smith, A. Heger, and I. Sudbery, “UMI-tools: Modeling sequencing errors in  
951 Unique Molecular Identifiers to improve quantification accuracy,” *Genome Res.*,  
952 2017.
- 953 [51] Y. Liao, G. K. Smyth, and W. Shi, “FeatureCounts: An efficient general purpose

- 954 program for assigning sequence reads to genomic features,” *Bioinformatics*, vol.  
955 30, no. 7, pp. 923–930, 2014.
- 956 [52] P. T. Spellman *et al.*, “Comprehensive identification of cell cycle-regulated genes  
957 of the yeast *Saccharomyces cerevisiae* by microarray hybridization,” *Mol. Biol. Cell*,  
958 vol. 9, no. 12, pp. 3273–3297, Dec. 1998.
- 959 [53] P. Côte, H. Herve, and M. Whiteway, “Transcriptional Analysis of the *Candida*  
960 *albicans* Cell Cycle,” *Mol. Biol. Cell*, vol. 20, no. 14, pp. 3363–3373, 2009.
- 961 [54] T. Stuart and R. Satija, “Integrative single-cell analysis,” *Nat. Rev. Genet.*, vol. 20,  
962 no. 5, pp. 257–272, 2019.
- 963 [55] Q. Mao, L. Wang, S. Goodison, and Y. Sun, “Dimensionality Reduction Via Graph  
964 Structure Learning,” in *Proceedings of the 21th ACM SIGKDD International*  
965 *Conference on Knowledge Discovery and Data Mining*, 2015, pp. 765–774.
- 966 [56] S. Frankel, R. Sohn, and L. Leinwand, “The use of sarkosyl in generating soluble  
967 protein after bacterial expression,” *Proc. Natl. Acad. Sci.*, vol. 88, pp. 1192–1196,  
968 1991.
- 969 [57] L. E. Henderson *et al.*, “A Histone Acetylation Switch Regulates H2A.Z Deposition  
970 by the SWR-C Remodeling Enzyme,” *Science (80-. )*, no. April, pp. 195–200, 2013.  
971  
972

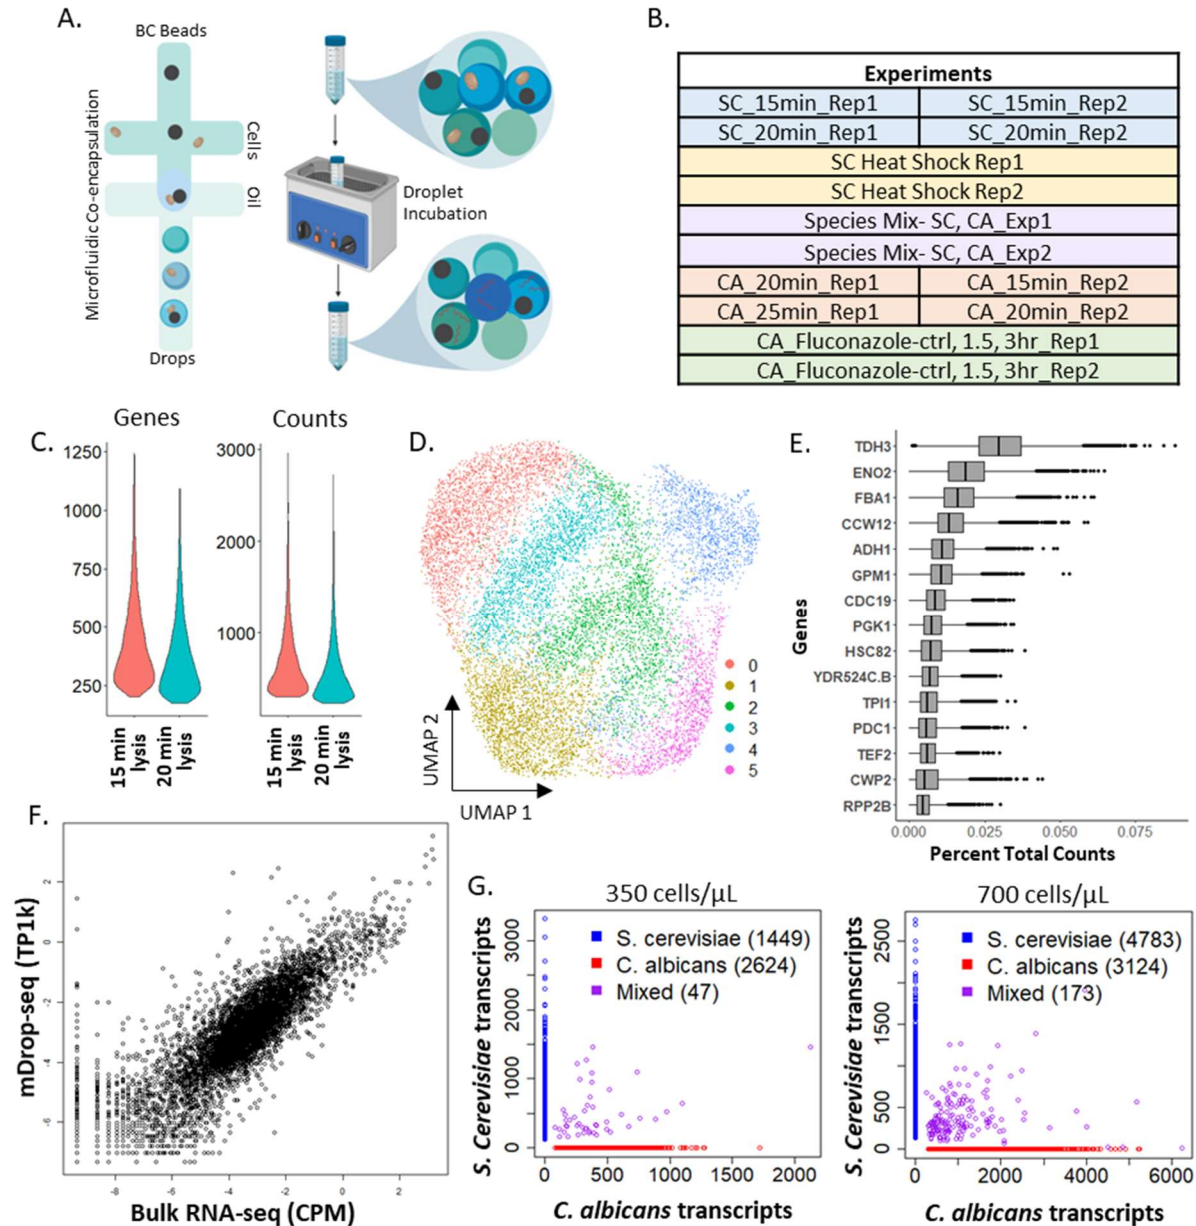

973

974 **Figure 1: mDrop-seq of *Saccharomyces cerevisiae* cells.** A) mDrop-seq experimental  
 975 schematic. B) List of mDrop-seq experiments on different yeast samples. C) Violin plots  
 976 showing the number of genes and UMI detected for each cell at two cell lysis times: 15  
 977 and 20 minutes. D) UMAP visualizing the results of clustering analysis on 12,012 *S.*  
 978 *cerevisiae* cells. E) Boxplot displaying the top 15 genes expressed by percentage of total  
 979 counts across 15 and 20 min lysis times. F) Correlation plot of average gene expression  
 980 between mDrop-seq (SC\_15min\_rep1) and bulk RNA-seq. G) Species-mixing plots  
 981 where each dot depicts a unique cellular barcode that align to *S. cerevisiae* (blue), *C.*  
 982 *albicans* (red), or both genomes (purple). Two Poisson loading concentrations of 300  
 983 cells/ $\mu$ L (left;  $\lambda = 0.08$ ) and 700 cells/ $\mu$ L (right;  $\lambda = 0.15$ ) are tested.

984

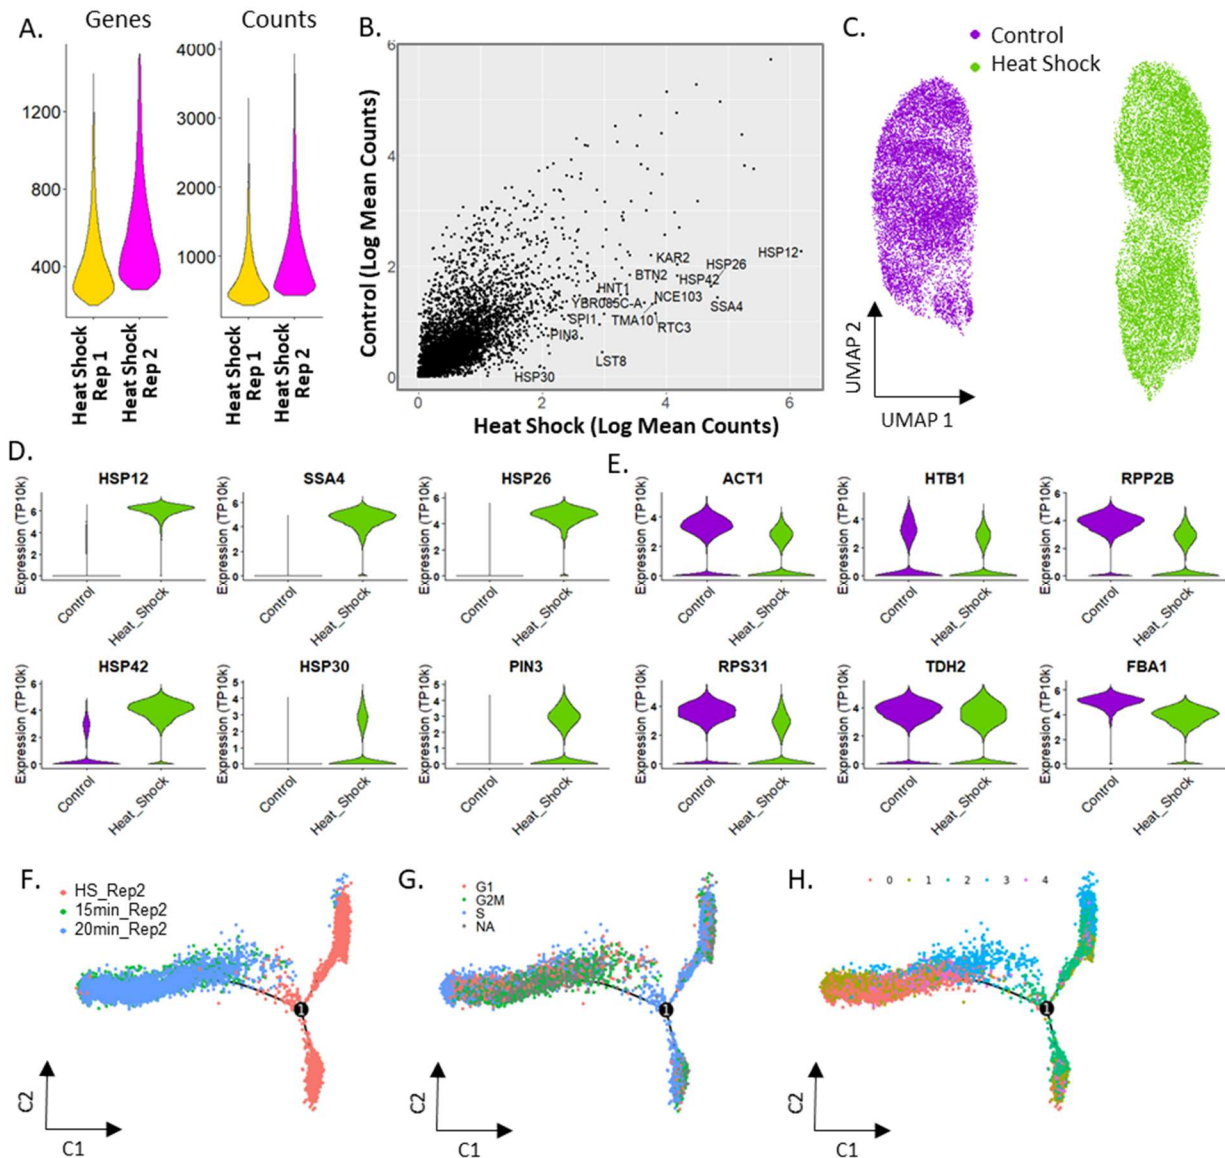

985

986 **Figure 2: Heat shock treatment of 26,019 *Saccharomyces cerevisiae* cells profiled**  
 987 **using mDrop-seq.** A) Violin plot displaying the number of genes and UMI for each heat-  
 988 shock replicate. B) Correlation between average gene expression values for the control  
 989 and heat-shocked *S. cerevisiae* datasets. C) UMAP displaying the clustering patterns of  
 990 the control and heat-shock datasets, including biological replicates. D) Violin plots  
 991 displaying the expression differences in control and heat-shocked datasets for several  
 992 heat-shock related genes. E) Violin plots displaying expression of several "house-  
 993 keeping" genes (actin, histones, ribosomal, and glycolysis) in heat shock and control data.  
 994 F-H) Pseudo-time trajectory of gene expression inferred from the combined control and  
 995 heat shocked *S. cerevisiae* dataset. Colors indicate F) experimental time points, G)  
 996 Cell cycle stages (cells that could not be assigned to a cell cycle stage are marked NA),  
 997 and H) cell-type clusters shown in S3A.

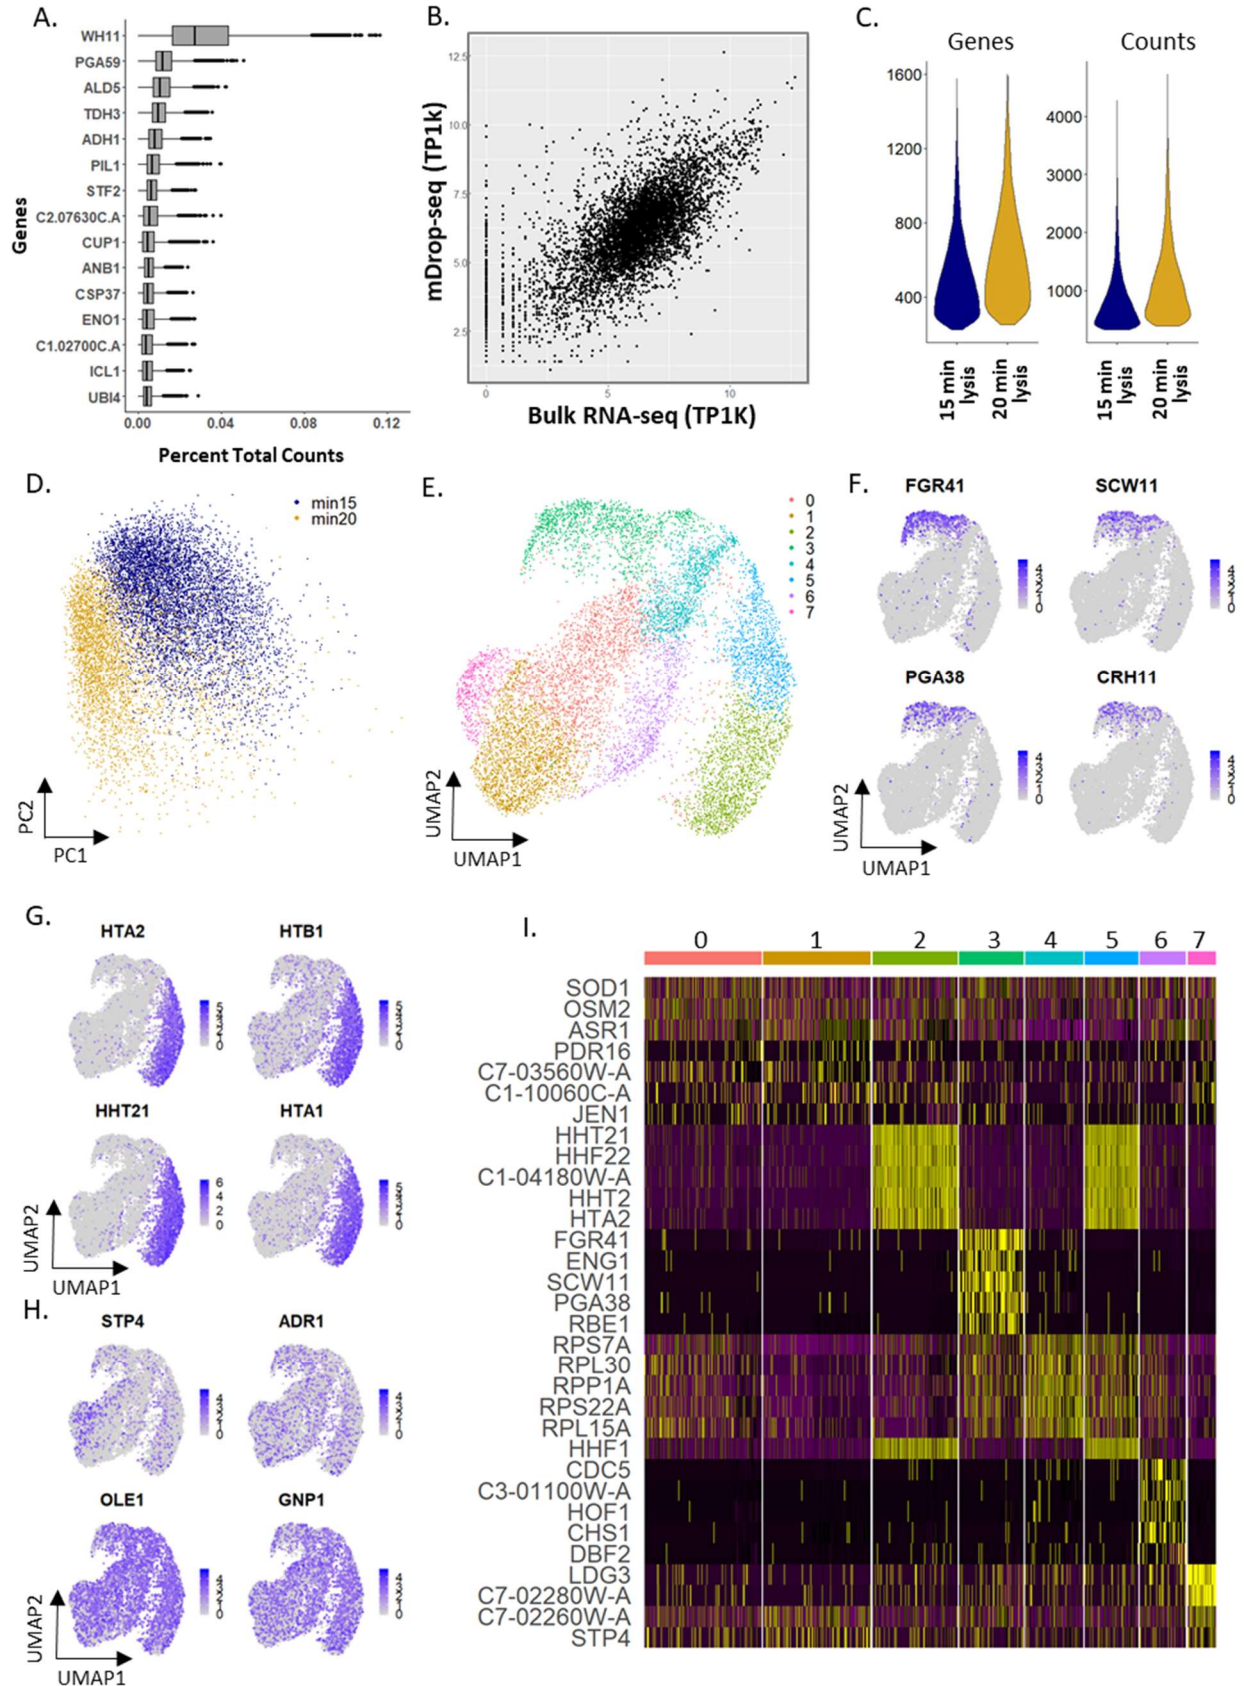

999 **Figure 3: mDrop-seq of 10,314 *Candida albicans* cells.** A) A boxplot of 15 genes with  
1000 highest expression in *C. albicans*, plotted by percentage of total counts. B) Plot comparing  
1001 average gene expression between CA\_rep2 data and bulk RNA-seq. C) Violin plots  
1002 displaying the genes and UMI counts per cell. D) Plot of PC 1 and 2 in mDrop-seq data  
1003 for 15 and 20 min incubation times. E) UMAP displaying the clustering analysis of 10,314  
1004 *C. albicans* cells detected after batch correction. F) Feature plots displaying 4 GPI-  
1005 anchored cell wall proteins that represent markers for cluster 3. G) Feature plots  
1006 displaying 4 histone tail genes that represent markers for clusters 2 and 5. H) Feature  
1007 plots of transcription factors, fatty acid biosynthesis, and hyphal formation genes involved  
1008 with *C. albicans* virulence. I) Heatmap displaying expressions of the top marker genes for  
1009 each cluster.

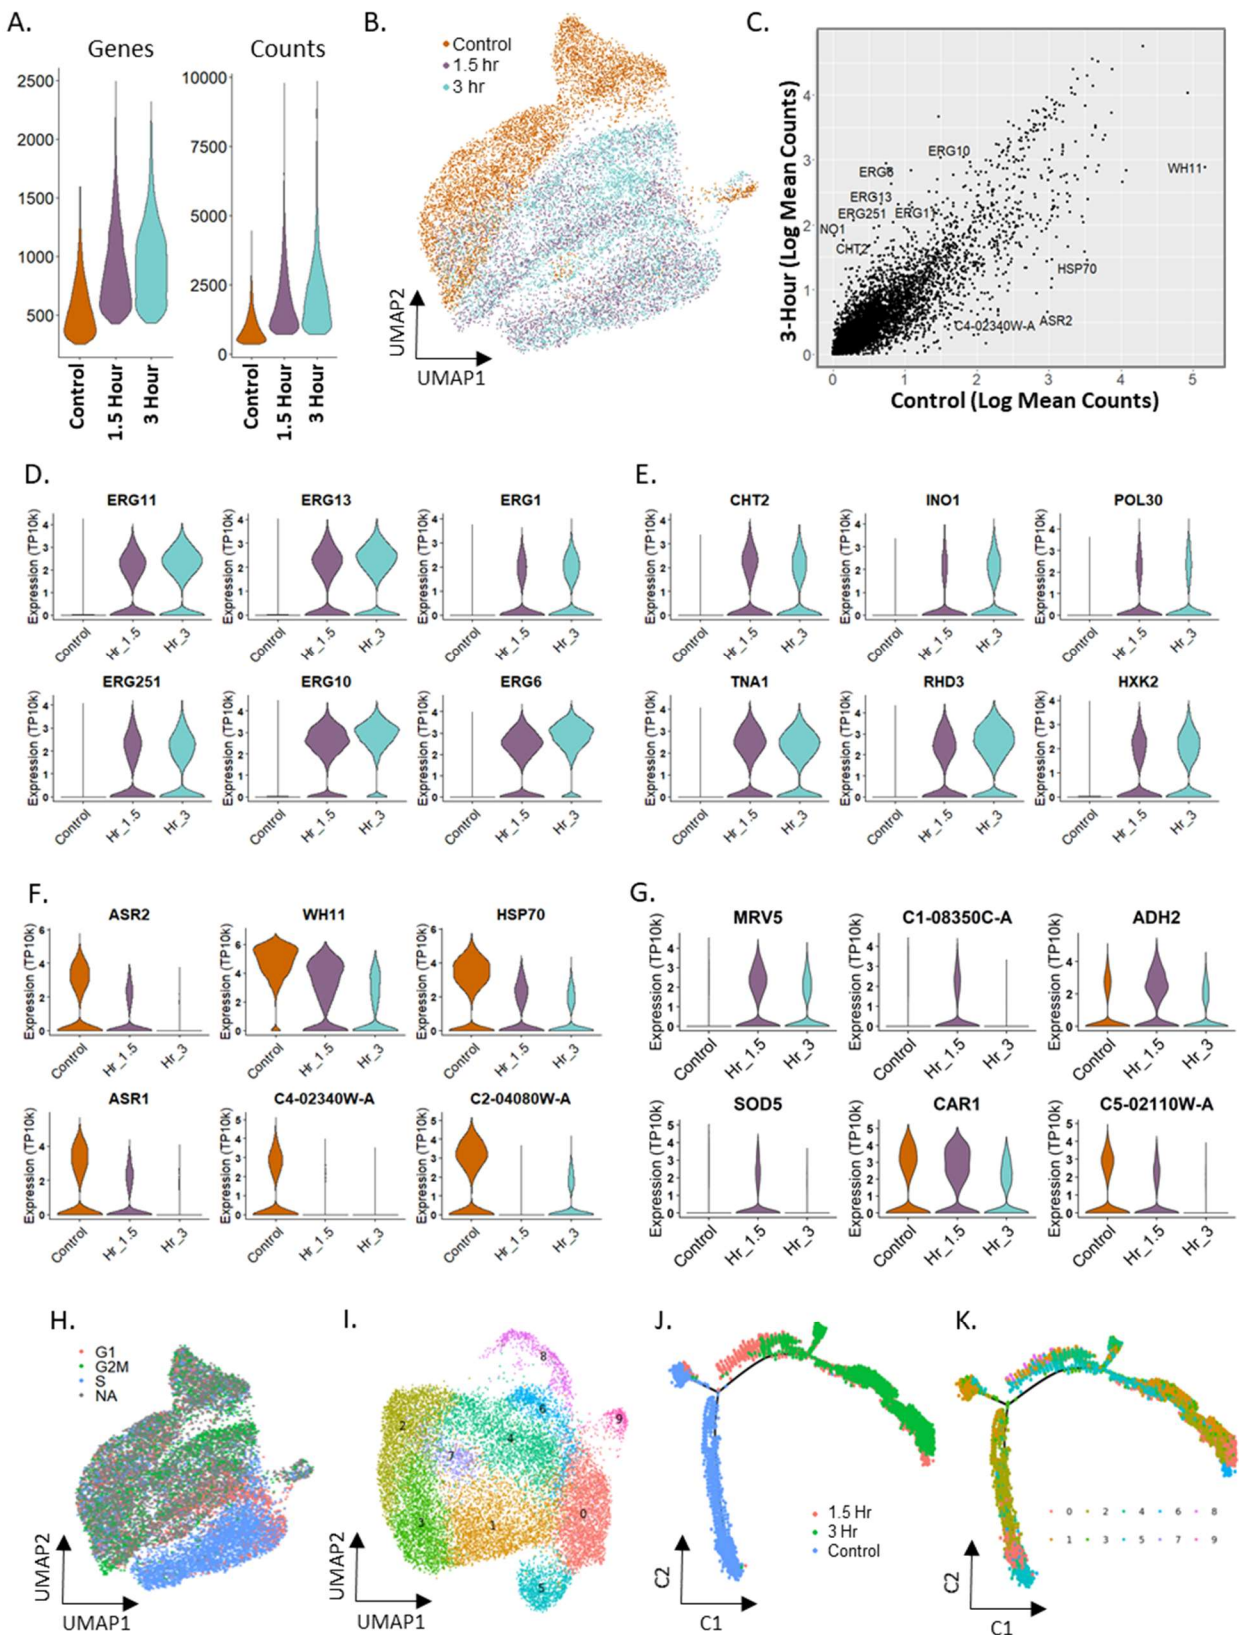

1010  
1011

1012 **Figure 4: Fluconazole treatment of 15,503 *Candida albicans* cells profiled using**  
1013 **mDrop-seq.** A) Violin plot displaying the number of genes and UMI for each fluconazole  
1014 time point B) UMAP displaying the clustering patterns of the integrated control and  
1015 fluconazole libraries. C) Correlation between the control and 3-Hour fluconazole exposed  
1016 yeast for gene expression. D) Violin plots displaying the expression differences in control  
1017 and fluconazole datasets for several ergosterol biosynthesis genes. E) Violin plots  
1018 displaying the expression differences of genes detected at significantly higher expression  
1019 in fluconazole treated data. F) Violin plots of genes that show significantly higher  
1020 expression in the control data. G) Violin plots of DEGs for the 1.5 hour fluconazole  
1021 exposed data. H) Cell Cycle phase assignment on the integrated UMAP. I) UMAP  
1022 displaying the integrated data after cell cycle regression. J-K) Pseudo-time trajectory of  
1023 the combined dataset inferred using Monocle. Colors indicate J) experimental time points,  
1024 and K) cell-type clusters shown in I.  
1025
